# Supplementary material for: N-Heterocyclic carbene-initiated epoxide/anhydride ring-opening copolymerization: effective and selective organoinitiators for the production of various polyesters
Source: Royal Society of Chemistry journal article supplement (doi:10.1039/d4py00778f), 2024-01-01
Supplement: d4py00778f1.pdf [file d4py00778f1.pdf]

## Supporting Information For

### ***N*-Heterocyclic Carbene-Initiated Epoxide/Anhydride Ring-Opening Copolymerization: Effective and Selective Organoinitiators for the Production of Various Polyesters**

Gaël Printz,<sup>[a]</sup> Redoy Gazi Shuvo,<sup>[a]</sup> Antoine Schweizer,<sup>[a]</sup> Dmytro Ryzhakov,<sup>[b]</sup> Christophe Gourlaouen,<sup>[c]</sup> Lielou Lantigner,<sup>[b]</sup> Béatrice Jacques,<sup>[a]</sup> Samir Messaoudi,<sup>[b]</sup> Franck Le Bideau,<sup>\*[b]</sup>  
Samuel Dagorne<sup>\*[a]</sup>

[a] Dr. G. Printz, A. Schweizer, Redoy Gazi Shuvo, Dr. B. Jacques, Dr. S. Dagorne

Institut de Chimie, CNRS – Université de Strasbourg

Strasbourg (France)

E-mail: [dagorne@unistra.fr](mailto:dagorne@unistra.fr)

[b] Dr. D. Ryzhakov, L. Lantigner, Dr. S. Messaoudi, Dr. F. Le Bideau

Université Paris-Saclay, CNRS, BioCIS

91400, Orsay (France)

E-mail: [franck.lebideau@universite-paris-saclay.fr](mailto:franck.lebideau@universite-paris-saclay.fr)

[c] Dr. Christophe Gourlaouen

Laboratoire de Modélisation et Simulations Moléculaires, Université de Strasbourg, UMR 7140,

F-67000 Strasbourg, France

## Table of Contents

|                                              |         |
|----------------------------------------------|---------|
| General procedures and synthesis details     | S3-S5   |
| NMR spectra for species <b>1</b>             | S6-S7   |
| Crystal data for species <b>1</b> (Table S1) | S8      |
| ROCOP runs with SA (Table S2)                | S9      |
| GPC and NMR data for the produced polyesters | S10-S29 |
| DSC data                                     | S30     |
| DFT computational details                    | S31-S34 |

**General aspects.** All experiments were performed under nitrogen atmosphere using standard Schlenk techniques or in a MBraun Unilab glove box. Toluene was first dried by using a solvent purification system (MBraun SPS) and stored for at least a couple of days over activated molecular sieves (4 Å) in a glovebox before use. All deuterated solvents (CD<sub>2</sub>Cl<sub>2</sub>, C<sub>6</sub>D<sub>6</sub>) were purchased from Eurisotope (CEA, Saclay, France), degassed under a N<sub>2</sub> flow, and stored over activated molecular sieves (4 Å) in a glovebox before use. All other chemicals were used as received. Epoxides CHO and PO were purchased on Sigma-Aldrich and were distilled twice prior to use under inert atmosphere. Anhydrides PA and SA were purchased on Sigma-Aldrich, recrystallized twice from CHCl<sub>3</sub>/toluene, then sublimed twice under vacuum prior to storage under inert atmosphere. [PPN]Cl was purchased from Aldrich and used as is. Carbenes IPr, IMes and Cl-IPr were prepared according to literature procedures.<sup>1,2,3</sup> NMR spectra were recorded by using BrukerAC 300, or 600 MHz NMR spectrometers in NMR tubes or in Teflon-valved J-Young NMR tubes at room temperature. Chemical shifts are given in ppm. Mass spectra were recorded at the Mass Spectrometry Department of the University of Strasbourg. Mass spectra were acquired by using a MALDI-TOF-TOF Autoflex II TOF-TOF (Bruker Daltonics, Bremen, Germany) equipped with a nitrogen laser ( $\lambda = 337$  nm). An external multipoint calibration was performed before each measurement with a standard peptide mixture and a standard protein mixture (which depended on the mass range analyzed). Scan accumulation and data processing were performed with FlexAnalysis 3.4 software. *trans*-2-[3-(4-*tert*-Butylphenyl)-2-methyl-2-propenylidene]malononitrile (DTCB) and 2,5-dihydroxybenzoic acid (DHB) was used as matrix for the analysis of the polyester samples. Size exclusion chromatography (SEC) analysis was performed by using a SEC system (with SEC columns temperature set at 30 °C) equipped with a Shimadzu RID10A refractometer detector using HPLC-grade THF as an eluent. For all GPC samples, 3 mg of the polymer sample is dissolved in 1 mL of THF and 25  $\mu$ L of the resulting solution is injected for analysis. Molecular weights and  $\bar{D}$  were calculated using polystyrene standards.

For the synthesis of monomers eugenyl glycidyl ether (EGE) and safrole oxide (SO),<sup>5</sup> all reagents were obtained from commercial sources and used without further purification unless otherwise stated. Organic solutions were concentrated by rotary evaporation (house vacuum, *ca.* 40 Torr) at 30 °C, unless otherwise noted. Analytical thin-layer chromatography (TLC) was performed using glass plates pre-coated with silica gel 60 F254 (0.25 mm thickness) impregnated with a fluorescent indicator (254 nm). TLC plates were visualized by UV light and/or by staining upon heating with KMnO<sub>4</sub> solution (1.6% potassium permanganate in conc. sulfuric acid), vaniline solution (15 g of vanillin, 250 mL of EtOH, 2.5 mL conc. H<sub>2</sub>SO<sub>4</sub>) and bromocresol green solution (0.1 g bromocresol green in 500 mL ethanol and 5 mL 0.1 M NaOH). Flash column chromatography was performed as described by Still et al.,<sup>4</sup> employing silica gel (60 Å pore size, 40-63 mm). IR spectra were recorded as thin films for oils and for solids by the reflexion method on a IRAffinity-1S FTIR spectrometer. The <sup>1</sup>H, <sup>13</sup>C {<sup>1</sup>H} and <sup>19</sup>F NMR spectra were recorded in CDCl<sub>3</sub> on Bruker Avance 300 and 400 spectrometers. Chemical shifts

---

<sup>1</sup> L. Jafarpour, E. D. Stevens, S. P. Nolan, *J. Organomet. Chem.* **2000**, 606, 49.

<sup>2</sup> A. J. Arduengo III, H.V.R. Dias, R. L. Harlow, M. Kline, *J. Am. Chem. Soc.* **1992**, 114, 5530.

<sup>3</sup> A. J. Arduengo, R. Krafczyk, R. Schmutzler, *Tetrahedron* **1999**, 55, 14523.

<sup>4</sup> W. C. Still, M. Kahn, A. Mitra, *J. Org. Chem.* **1978**, 43, 2923.

are reported in ppm relative to the solvent residual peak in  $\text{CDCl}_3$  ( $\delta$  7.26) for  $^1\text{H}$  NMR. For the  $^{13}\text{C}\{^1\text{H}\}$  NMR spectra, the solvent signals of  $\text{CDCl}_3$  ( $\delta$  77.16) were used as the internal standard. A combination of COSY, HSQC, HMBC and nOe experiments was used to aid assignment when necessary. High resolution mass spectra (HRMS) were performed on an Agilent 1260 Infinity system with a quadrupole time-of-flight (Q-TOF) mass analyser. Mass spectra were realized by electrospray impact (ESI) and atmospheric pressure chemical ionisation (APCI).

### Synthesis of racemic 5-(oxiran-2-ylmethyl)benzo[d][1,3]dioxole (safrole oxide, SO).

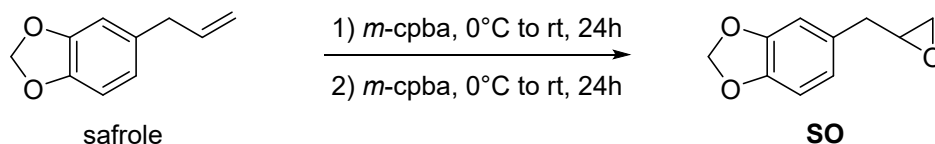

*m*-Chloroperbenzoic acid (50% = 16.78 g, 48.6 mmol) was slowly added to a solution of safrole (60.6 g, 40.5 mmol) in chloroform (300 mL) at 0 °C. The reaction mixture was stirred at room temperature for 24 hours, cooled to 0°C and *m*-chloroperbenzoic acid (50% =, 16.78 g, 48.6 mmol) was slowly added. The reaction mixture was stirred at room temperature for another 24 h and evaporated to dryness. The resulting oil was purified by flash chromatography two times (PE/EtOAc = 90:10 and PE/DCM = 70:30 for the second purification) to give SO as a yellow liquid (3.5 g, 48 %). The  $^1\text{H}$  NMR spectrum shows the presence of water (6%, 1.56 ppm). The NMR data are consistent with the literature.<sup>5</sup>

$^1\text{H}$  NMR (300 MHz,  $\text{CDCl}_3$ ):  $\delta$  6.81–6.63 (m, 3 H), 5.93 (s, 2 H), 3.15–3.07 (m, 1 H), 2.87–2.70 (m, 3 H), 2.53 (dd,  $J$  = 4.5, 2.4 Hz, 1 H) ppm.  $^{13}\text{C}$  NMR (75 MHz,  $\text{CDCl}_3$ ):  $\delta$  147.7, 146.3, 130.8, 121.8, 109.4, 108.2, 100.8, 52.4, 46.6, 38.3 ppm.

### Synthesis of racemic 2-((4-allyl-2-methoxyphenoxy)methyl)oxirane (eugenyl glycidyl ether, EGE).

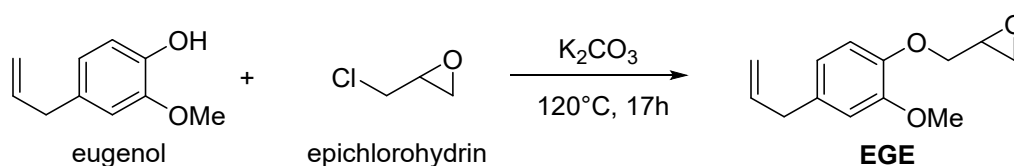

A mixture of eugenol (17.2 g, 105 mmol) and  $\text{K}_2\text{CO}_3$  (17.4 g, 125 mmol) in epichlorohydrin (44 ml, 530 mmol) was stirred at 120 °C for 17 hours. Excess epichlorohydrin was carefully evaporated to dryness. The resulting mixture was purified by flash chromatography (PE/EtOAc = 70:30) to afford EGE (13.1 g, 57%) as a white solid.

**General procedure for epoxide/anhydride ROCOP by NHCs.** All polymerization experiments were prepared under a nitrogen atmosphere in a glove box. The appropriate amount of epoxide/anhydride monomers and the NHC initiator (10  $\mu\text{mol}$ ) were charged in a vial

<sup>5</sup> L.-C. Shen, S.-Y. Chiang, Ho, I.-T.; Wu, K.-Y.; Chung, W.-S. *Eur J Org Chem* **2012**, 2012, 792.

equipped with a Teflon screw-cap. A magnetic stirring bar was added to the reaction mixture, and the latter was then immersed in preheated oil bath at 90 °C. It was stirred for the appropriate time with monomer conversion being periodically monitored by <sup>1</sup>H NMR spectroscopy. After the reaction, the crude residue was dissolved at room temperature in a minimum of CH<sub>2</sub>Cl<sub>2</sub>, and an excess of methanol was added to quench the reaction mixture leading to polymer precipitation. The polymer was washed three times with methanol, dried under vacuum and analysed by using <sup>1</sup>H NMR spectroscopy, GPC analysis and MALDI-TOF mass spectrometry.

**Synthesis of PA-IMes (1).** In the N<sub>2</sub>-filled glovebox were prepared a vial containing a solution of PA (29.4 mg, 2.0 mmol) in 1 mL toluene, and a vial containing IMes (60 mg, 2.0 mmol) in 1 mL toluene. Using a Pasteur pipette, the PA solution was added to the carbene solution upon stirring at room temperature. A precipitate formed instantly upon addition and the mixture was left an additional 30 min under stirring. Toluene was removed using a Pasteur pipette and the precipitate was washed twice with toluene (2x2 mL). Drying the resulting precipitate under vacuum overnight led to pure PA-IMes (**1**, 79% yield) as deduced from all characterization data. XRD-suitable single crystals of **1** were grown from a 2/1 CH<sub>2</sub>Cl<sub>2</sub>/pentane solution stored at -30 °C. Pure **1** was analyzed by <sup>1</sup>H, <sup>13</sup>C, HMBC and HSQC NMR in CD<sub>2</sub>Cl<sub>2</sub>, all consistent with the proposed structure. Elemental analysis for **1** (C<sub>29</sub>H<sub>28</sub>N<sub>2</sub>O<sub>3</sub>): calcd. C, 76.97; H, 6.24; N, 6.19. Found. C, 77.04; H, 6.01; N, 6.32. <sup>1</sup>H RMN (CD<sub>2</sub>Cl<sub>2</sub>, 400 MHz) δ: 2.18 (s, 12H), 2.26 (s, 6H), 6.85 (s, 4H), 6.88 (d, 1H), 7.00 (t, J = 6,6 Hz, 1H), 7.17 (t, 1H), 7.23 (s, 2H), 7,55 (d, J = 6,6 Hz, 1H). <sup>13</sup>C{<sup>1</sup>H} RMN, (CD<sub>2</sub>Cl<sub>2</sub>, 100 MHz) δ: 18.2, 21.1, 124.0, 125.5, 128.7, 129.2, 129.7, 130.4, 132.4, 135.1, 138.5, 140.0, 141.0, 143.2, 168.3, 176.4.

**X-ray crystallography analysis of species 1.** A crystal of **1** was placed in oil, and a single crystal was selected, mounted on a micromount and placed in a low-temperature N<sub>2</sub> stream. X-Ray diffraction data collection was carried out on a Bruker PHOTON-III DUO CPAD diffractometer equipped with an Oxford Cryosystem liquid N<sub>2</sub> device, using Mo-Kα radiation (λ = 0.71073 Å). The crystal-detector distance was 38 mm. The cell parameters were determined (APEX4 software)<sup>6</sup> from reflections taken from one set of 180 frames, each at 1s exposure. The structures were solved using the program SHELXT-2014.<sup>7</sup> The refinement and all further calculations were carried out using SHELXL-2014.<sup>8</sup> The hydrogen atoms of the dichloromethane solvent were located from Fourier difference, but they were not refined. The other H-atoms were included in calculated positions and treated as riding atoms using SHELXL default parameters. The non-H atoms were refined anisotropically, using weighted full-matrix least-squares on *F*<sup>2</sup>. A semi-empirical absorption correction was applied using SADABS in APEX4; transmission factors: T<sub>min</sub>/T<sub>max</sub> = 0.7161/0.7460.

<sup>6</sup> “M86-EXX278V1 APEX4 User Manual”, Bruker Corporation, 2021.

<sup>7</sup> G. M. Sheldrick, *Acta Cryst.* **2015**, A71, 3-8.

<sup>8</sup> G. M. Sheldrick, *Acta Cryst.* **2015**, C71, 3-8.

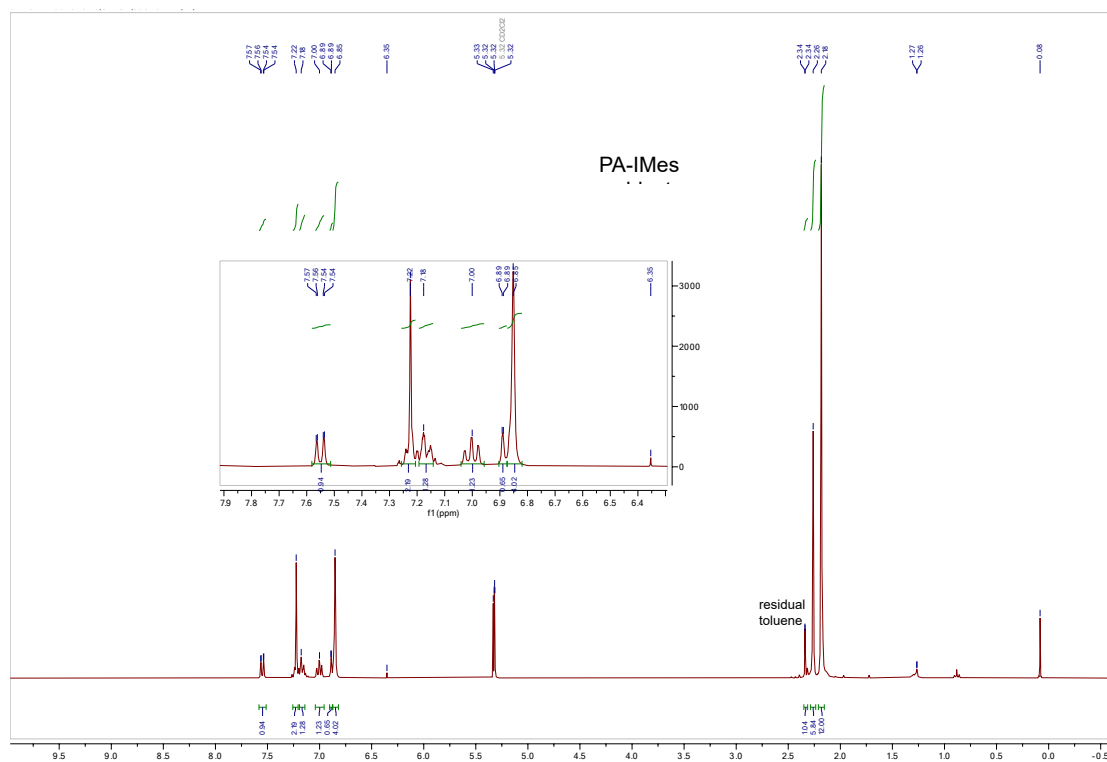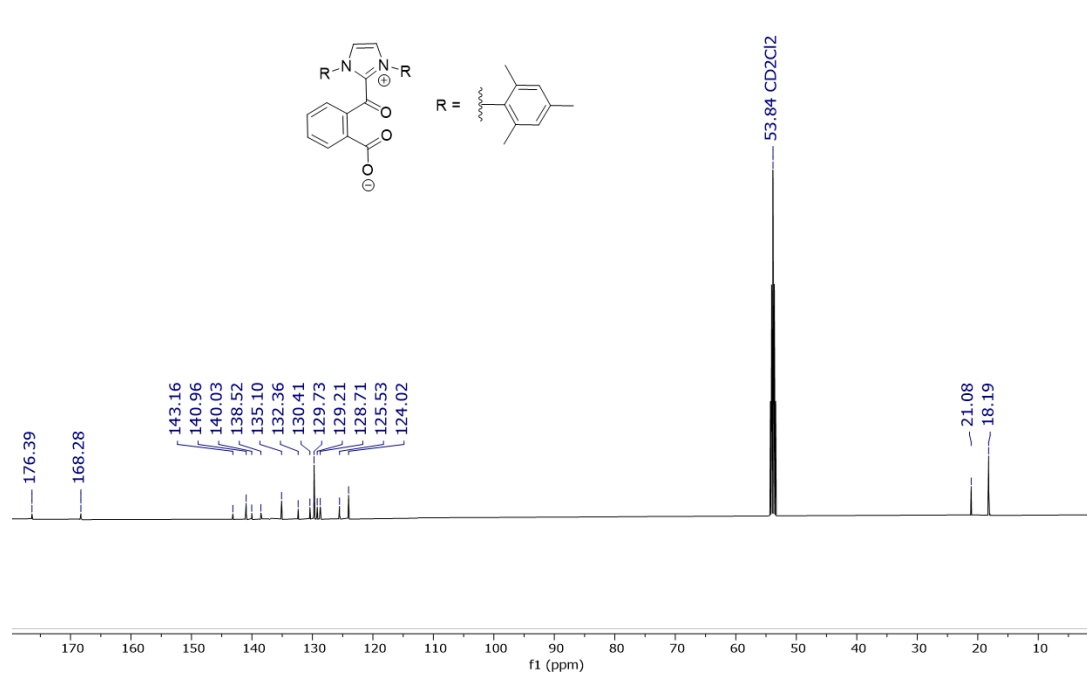

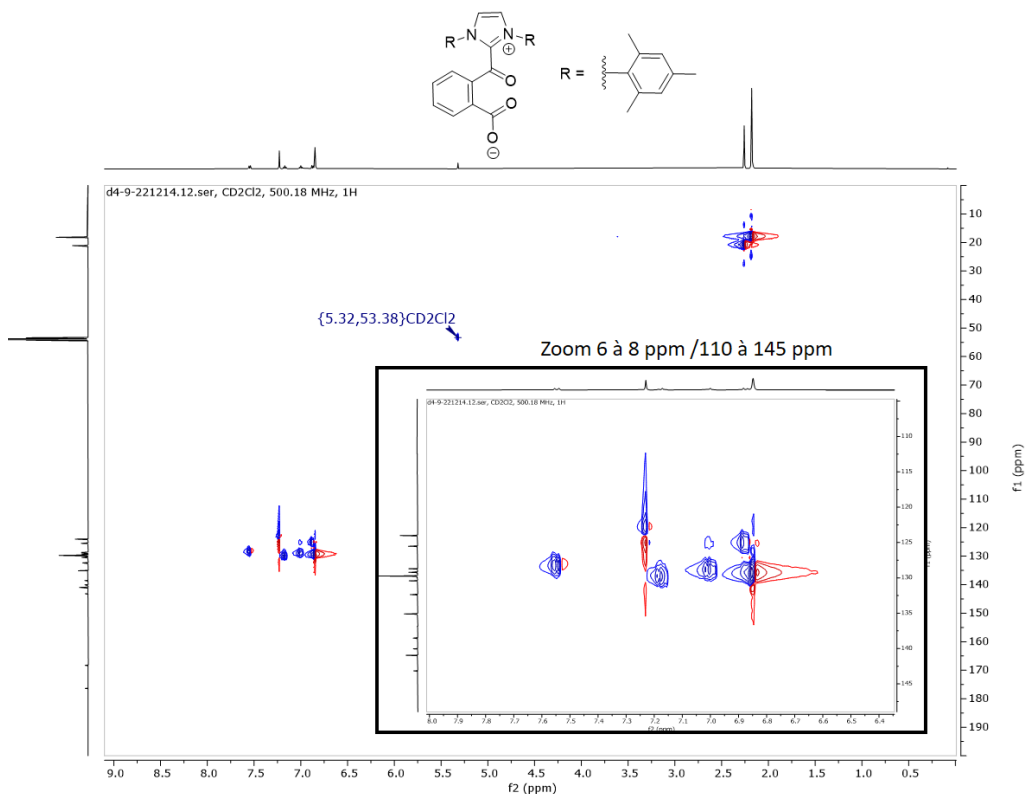

**Figure S3.** 2D HSQC NMR spectrum (CD<sub>2</sub>Cl<sub>2</sub>, 500 MHz) of isolated PA-IMes produced by reaction of 1 equiv of IMes with PA.

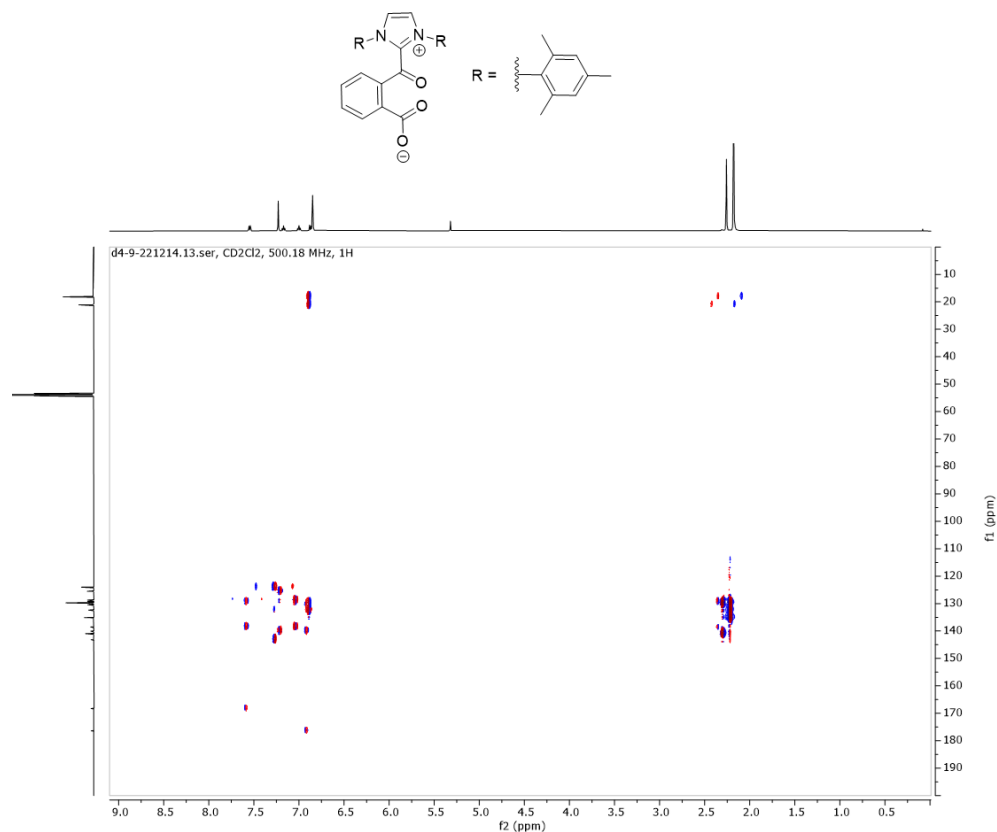

**Figure S4.** 2D HSQC NMR spectrum (CD<sub>2</sub>Cl<sub>2</sub>, 500 MHz) of isolated PA-IMes produced by reaction of 1 equiv of IMes with PA.

**Table S1.** Crystal data and structure refinement for IMes-PA (1) (CCDC 2367268).

|                                   |                                                                                                                         |
|-----------------------------------|-------------------------------------------------------------------------------------------------------------------------|
| Empirical formula                 | C <sub>59</sub> H <sub>58</sub> Cl <sub>2</sub> N <sub>4</sub> O <sub>6</sub>                                           |
| Formula weight                    | 989.99                                                                                                                  |
| Temperature                       | 120(2) K                                                                                                                |
| Wavelength                        | 0.71073 Å                                                                                                               |
| Crystal system, space group       | Monoclinic, P 21/c                                                                                                      |
| Unit cell dimensions              | a = 8.0672(3) Å    alpha = 90 deg.<br>b = 13.0590(7) Å    beta = 90.676(2) deg.<br>c = 24.6529(12) Å    gamma = 90 deg. |
| Volume                            | 2597.0(2) Å <sup>3</sup>                                                                                                |
| Z, Calculated density             | 2, 1.266 Mg/m <sup>3</sup>                                                                                              |
| Absorption coefficient            | 0.181 mm <sup>-1</sup>                                                                                                  |
| F(000)                            | 1044                                                                                                                    |
| Crystal size                      | 0.200 x 0.100 x 0.080 mm                                                                                                |
| Theta range for data collection   | 2.272 to 30.036 deg.                                                                                                    |
| Limiting indices                  | -11 ≤ h ≤ 11, -18 ≤ k ≤ 18, -34 ≤ l ≤ 34                                                                                |
| Reflections collected / unique    | 104745 / 7609 [R(int) = 0.0697]                                                                                         |
| Completeness to theta             | 25.242    100.0 %                                                                                                       |
| Absorption correction             | Semi-empirical from equivalents                                                                                         |
| Max. and min. transmission        | 0.7460 and 0.7161                                                                                                       |
| Refinement method                 | Full-matrix least-squares on F <sup>2</sup>                                                                             |
| Data / restraints / parameters    | 7609 / 0 / 331                                                                                                          |
| Goodness-of-fit on F <sup>2</sup> | 1.025                                                                                                                   |
| Final R indices [I > 2sigma(I)]   | R1 = 0.0514, wR2 = 0.1210                                                                                               |
| R indices (all data)              | R1 = 0.0732, wR2 = 0.1359                                                                                               |
| Extinction coefficient            | n/a                                                                                                                     |
| Largest diff. peak and hole       | 0.431 and -0.867 e.Å <sup>-3</sup>                                                                                      |



**Table S2.** ROCOP of SA and CHO/PO initiated by NHCs IMes, IPr and Cl-IPr <sup>a</sup>

|   | NHC initiator    | Epoxide | SA/Epoxide/<br>NHC ratio | Time (h) | Conv. SA (%) <sup>b</sup> | Ester linkage (%) <sup>b</sup> | <i>M</i> <sub>n</sub> (kg/mol) <sup>c</sup> | <i>D</i> <sup>c</sup> |
|---|------------------|---------|--------------------------|----------|---------------------------|--------------------------------|---------------------------------------------|-----------------------|
| 1 | IPr              | CHO     | 60:70:1                  | 16       | 94                        | 88                             | 5.75                                        | 1.52                  |
| 2 | IMes             | CHO     | 250:300:1                | 16       | 96                        | 86                             | 2.61                                        | 1.79                  |
| 3 | IPrCl            | CHO     | 250:300:1                | 16       | 87                        | 82                             | 2.81                                        | 1.53                  |
| 4 | IPr              | CHO     | 250:300:1                | 16       | 92                        | 81                             | 2.33                                        | 1.37                  |
| 5 | IPr <sup>d</sup> | CHO     | 250:300:1                | 16       | 33                        | 80                             | 1.45                                        | 1.24                  |
| 6 | IPr              | PO      | 250:300:1                | 16       | 96                        | > 98                           | 5.92                                        | 1.82                  |

<sup>a</sup> Conditions (unless indicated otherwise): neat conditions (no solvent), 90 °C. <sup>b</sup> determined by <sup>1</sup>H NMR.

<sup>c</sup> Determined by GPC analysis (THF, room temperature) using polystyrene standards. <sup>d</sup> ROCOP performed at 70 °C.

## Data for the produced polyesters

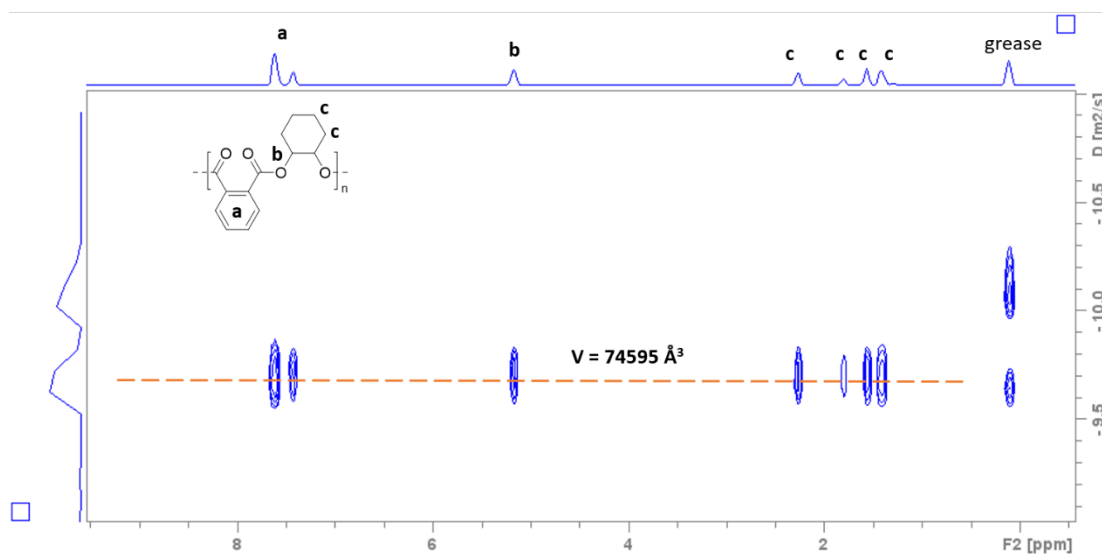

**Figure S5.**  $^1\text{H}$  DOSY NMR ( $\text{CDCl}_3$ , 600 MHz) of isolated poly(PA-*alt*-CHO) formed from the ROCOP of PA and CHO initiated by IPr (PA/CHO/IPr (60/70/1), 90 °C, 16 h, 95% conversion of PA,  $M_n = 10.2 \text{ kg mol}^{-1}$ ,  $D = 1.05$ ). The estimated volume ( $V = 74595 \text{ \AA}^3$ ) was deduced from the measured diffusion coefficient ( $D = 1.55 \times 10^{-10} \text{ m}^2 \text{ s}^{-1}$ ).

**Figure S6.**  $^1\text{H}$  NMR spectrum (300 MHz,  $\text{CDCl}_3$ ) of isolated poly(PA-*alt*-CHO) formed from the ROCOP of PA and CHO initiated by IPr. Conditions: 60/70/1 (PA/CHO/IPr), no solvent, 90 °C, 16 h (95 % conversion of PA).

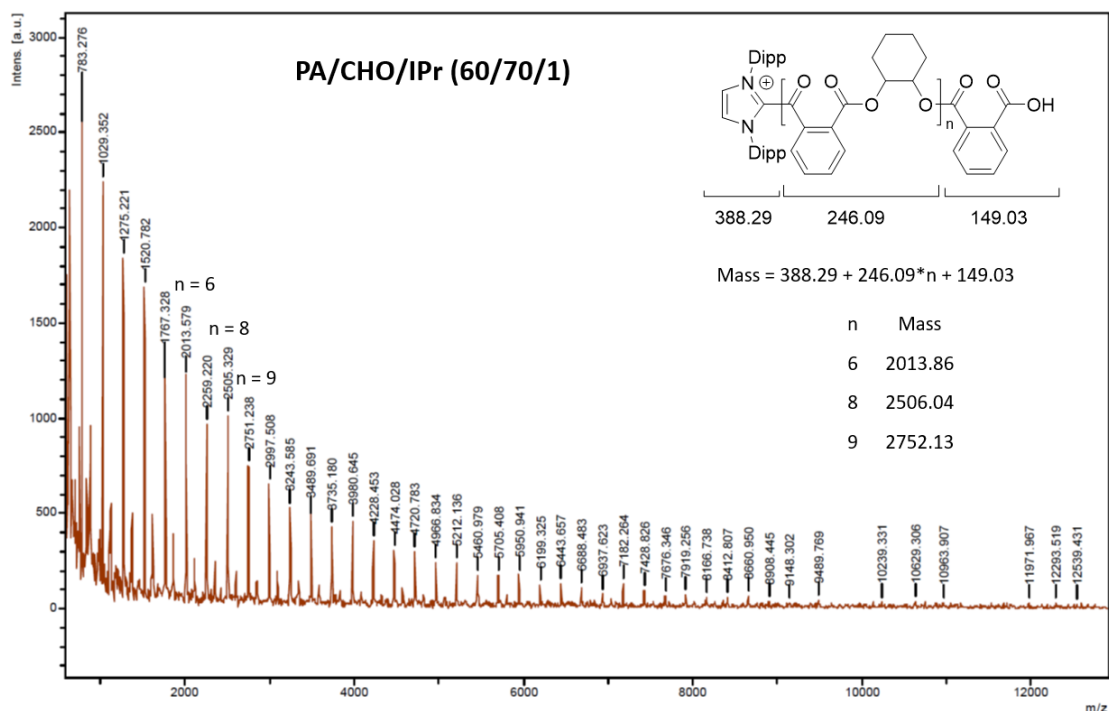

**Figure S7.** MALDI-TOF mass spectrum data for isolated p(PA-CHO) formed from the ROCOP of PA and CHO initiated by IPr. Conditions: 60/70/1 (PA/CHO/IPr), no solvent, 90 °C, 16 h (95 % conversion of PA).

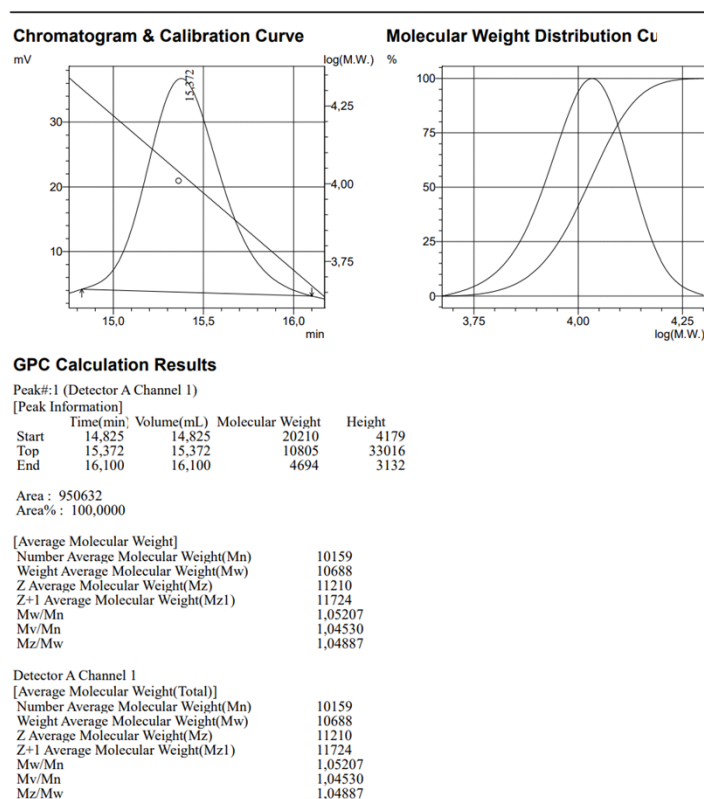

**Figure S8.** GPC traces of isolated p(PA-CHO) formed from the ROCOP of PA and CHO initiated by IPr. Conditions: 60/70/1 (PA/CHO/IPr), no solvent, 90 °C, 16 h (95 % conversion of PA).

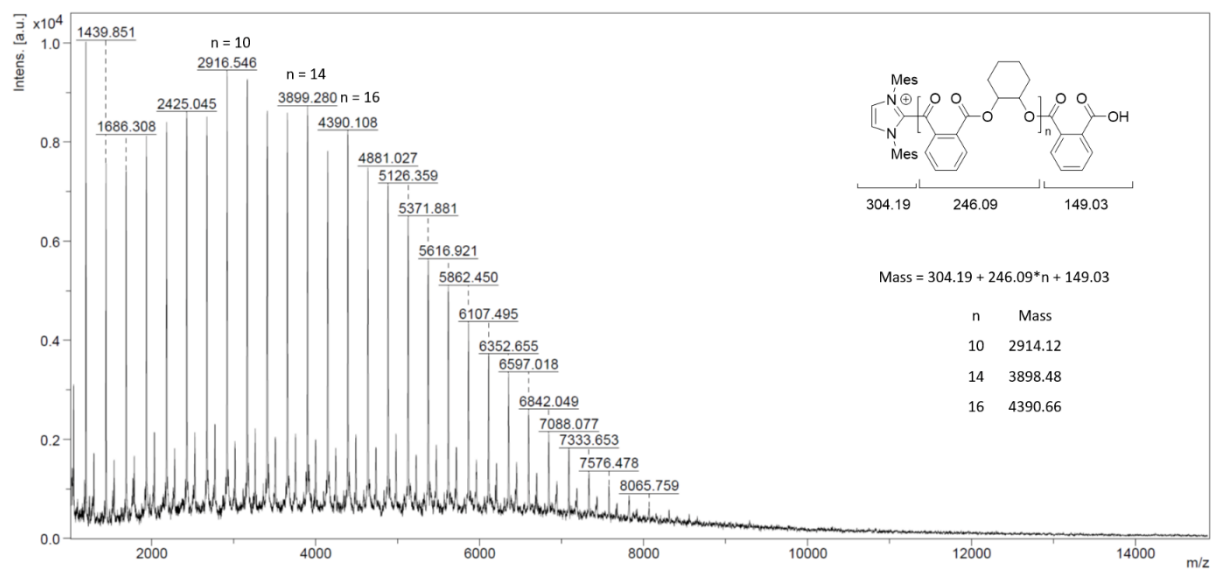

**Figure S9.** MALDI-TOF mass spectrum data for isolated p(PA-CHO) formed from the ROCOP of PA and CHO initiated by IMes. Conditions: 60/70/1 (PA/CHO/IPr), no solvent, 90 °C, 16 h (95 % conversion of PA).

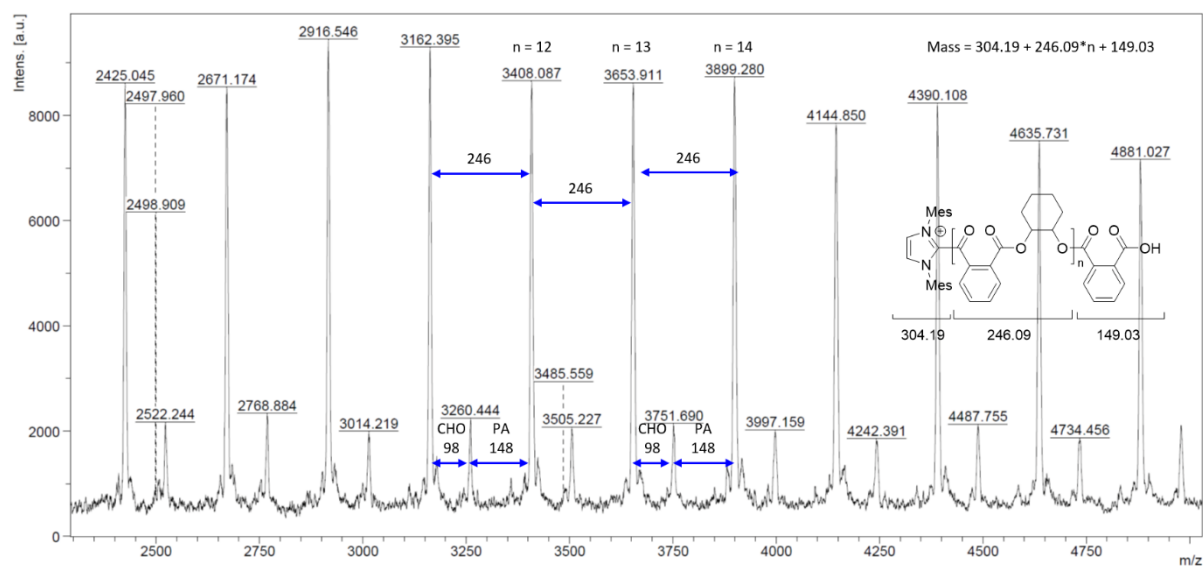

**Figure S10.** Zoom-in of the MALDI-TOF mass spectrum data for isolated poly(PA-*alt*-CHO) formed from the ROCOP of PA and CHO initiated by IMes. Conditions: 60/70/1 (PA/CHO/IPr), no solvent, 90 °C, 16 h (95 % conversion of PA).

**Figure S11.**  $^1\text{H}$  NMR spectrum (300 MHz,  $\text{CDCl}_3$ ) of isolated poly(PA-*alt*-CHO) formed from the ROCOP of PA and CHO initiated by IPr. Conditions: 250/300/1 (PA/CHO/IPr), no solvent, 90 °C, 16 h (100 % conversion of PA).

**Figure S12.**  $^1\text{H}$  NMR spectrum (300 MHz,  $\text{CDCl}_3$ ) of isolated poly(PA-*alt*-CHO) formed from the ROCOP of PA and CHO initiated by IPrCl. Conditions: 250/300/1 (PA/CHO/IPr), no solvent, 90 °C, 16 h (100 % conversion of PA).

## ==== Shimadzu LCsolution GPC Analysis Report ====

Acquired by : Admin  
 Sample Name : rs044polymer  
 Sample ID : rs044polymer  
 Vail# :  
 Injection Volume : 100 uL  
 Data Filename : rs044polymer.lcd  
 Method Filename : gpc.lcm  
 Batch Filename :  
 Report Filename : Report\_template.lcr  
 Date Acquired : 02/04/2024 16:50:26  
 Data Processed : 02/04/2024 17:15:29

### Chromatogram & Calibration Curve

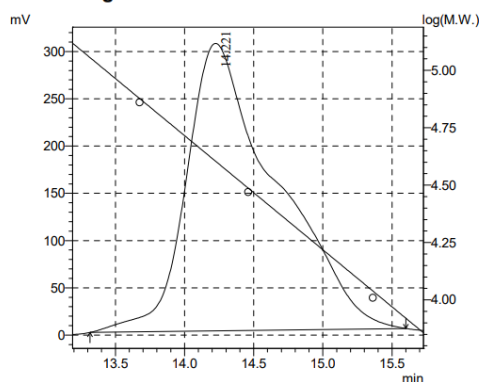

### Molecular Weight Distribution Curve

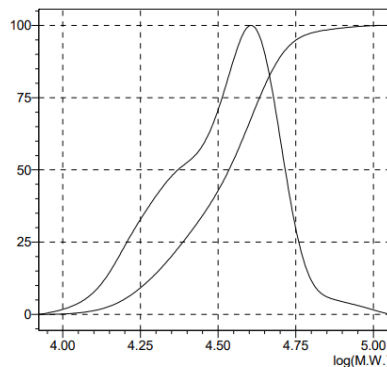

### GPC Calculation Results

Peak#:1 (Detector A Ch1)

[Peak Information]

|       | Time(min) | Volume(mL) | Molecular Weight | Height |
|-------|-----------|------------|------------------|--------|
| Start | 13.317    | 13.317     | 113655           | 2749   |
| Top   | 14.221    | 14.221     | 40366            | 304250 |
| End   | 15.600    | 15.600     | 8322             | 7003   |

Area : 13800263  
Area% : 100.0000

[Average Molecular Weight]

|                                     |         |
|-------------------------------------|---------|
| Number Average Molecular Weight(Mn) | 29702   |
| Weight Average Molecular Weight(Mw) | 34932   |
| Z Average Molecular Weight(Mz)      | 40212   |
| Z+1 Average Molecular Weight(Mz1)   | 45621   |
| Mw/Mn                               | 1.17609 |
| Mv/Mn                               | 1.15219 |
| Mz/Mw                               | 1.15115 |

Detector A Ch1

[Average Molecular Weight(Total)]

|                                     |         |
|-------------------------------------|---------|
| Number Average Molecular Weight(Mn) | 29702   |
| Weight Average Molecular Weight(Mw) | 34932   |
| Z Average Molecular Weight(Mz)      | 40212   |
| Z+1 Average Molecular Weight(Mz1)   | 45621   |
| Mw/Mn                               | 1.17609 |
| Mv/Mn                               | 1.15219 |
| Mz/Mw                               | 1.15115 |

C:\LabSolutions\Data\Shuvo\Results\rs044polymer.lcd

**Figure S13.** GPC traces of isolated p(PA-CHO) formed from the ROCOP of PA and CHO initiated by PA-IMes. Conditions: 250/300/1 (PA/CHO/IPr), no solvent, 90 °C, 16 h (97 % conversion of PA).

**Figure S14.**  $^{13}\text{C}\{^1\text{H}\}$  NMR of isolated poly(PA-*alt*-CHO) formed from the ROCOP of PA and CHO initiated by PA-IMes. Conditions: 250/300/1 (PA/CHO/IPr), no solvent, 90 °C, 16 h (97 % conversion of PA).

**Figure S15.** DEPT  $^{13}\text{C}$  NMR (125 MHz,  $\text{CDCl}_3$ ) of isolated p(PA-CHO) formed from the ROCOP of PA and CHO initiated by PA-IMes. Conditions: 250/300/1 (PA/CHO/IPr), no solvent, 90 °C, 16 h (97 % conversion of PA).



**Figure S16.**  $^1\text{H}$  NMR spectrum (300 MHz,  $\text{CDCl}_3$ ) of isolated poly(PA-*alt*-PO) formed from the ROCOP of PA and PO initiated by IPr. Conditions: 250/300/1 (PA/PO/IPr), no solvent, 90 °C, 16 h (80 % conversion of PA).

**Figure S17.**  $^{13}\text{C}\{^1\text{H}\}$  NMR spectrum (125 MHz,  $\text{CDCl}_3$ ) of isolated poly(PA-*alt*-PO) formed from the ROCOP of PA and PO initiated by IPr. Conditions: 250/300/1 (PA/PO/IPr), no solvent, 90 °C, 16 h (80 % conversion of PA).

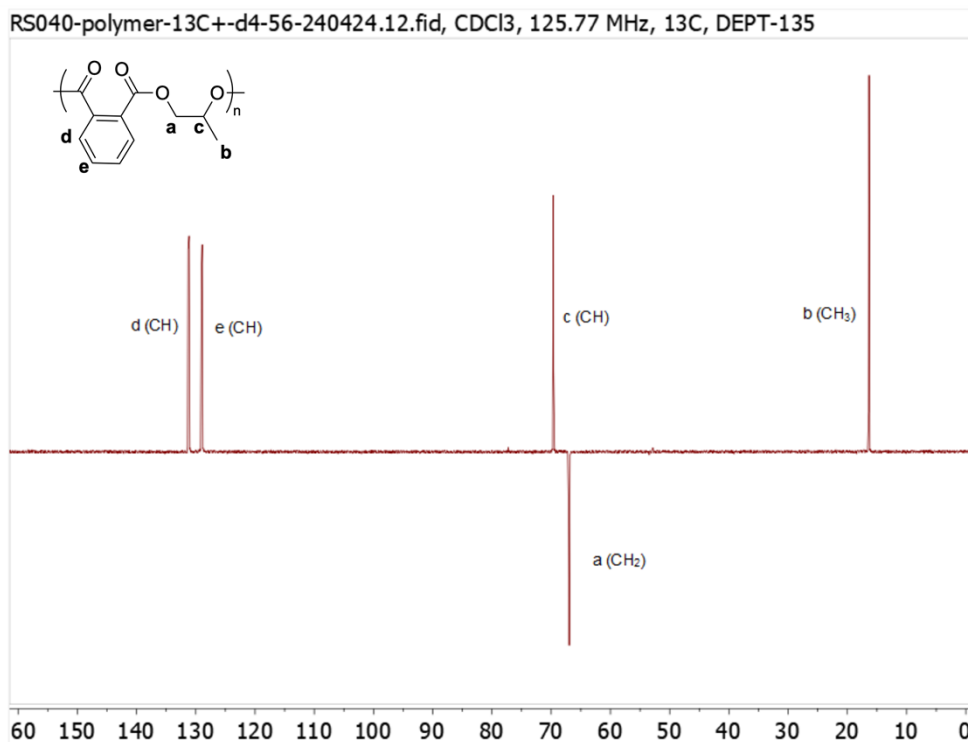

**Figure S18.** DEPT <sup>13</sup>C NMR spectrum (125 MHz, CDCl<sub>3</sub>) of isolated p(PA-*alt*-PO) formed from the ROCOP of PA and PO initiated by IPr. Conditions: 250/300/1 (PA/PO/IPr), no solvent, 90 °C, 16 h (80 % conversion of PA).

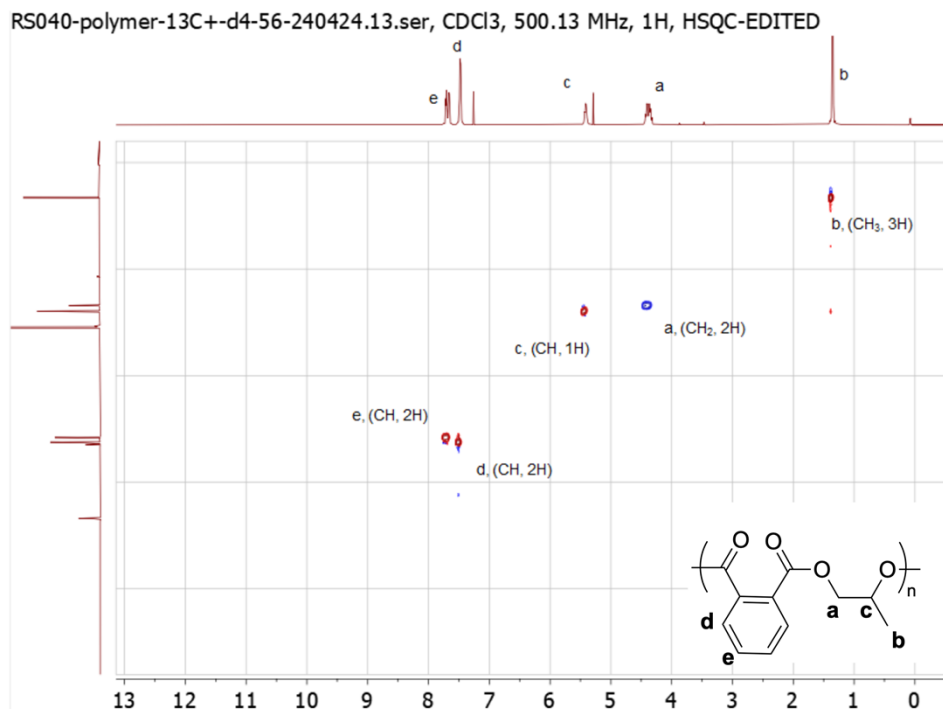

**Figure S19.** HSQC NMR spectrum (500 MHz, CDCl<sub>3</sub>) of isolated p(PA-*alt*-PO) formed from the ROCOP of PA and PO initiated by IPr. Conditions: 250/300/1 (PA/PO/IPr), no solvent, 90 °C, 16 h (80 % conversion of PA).

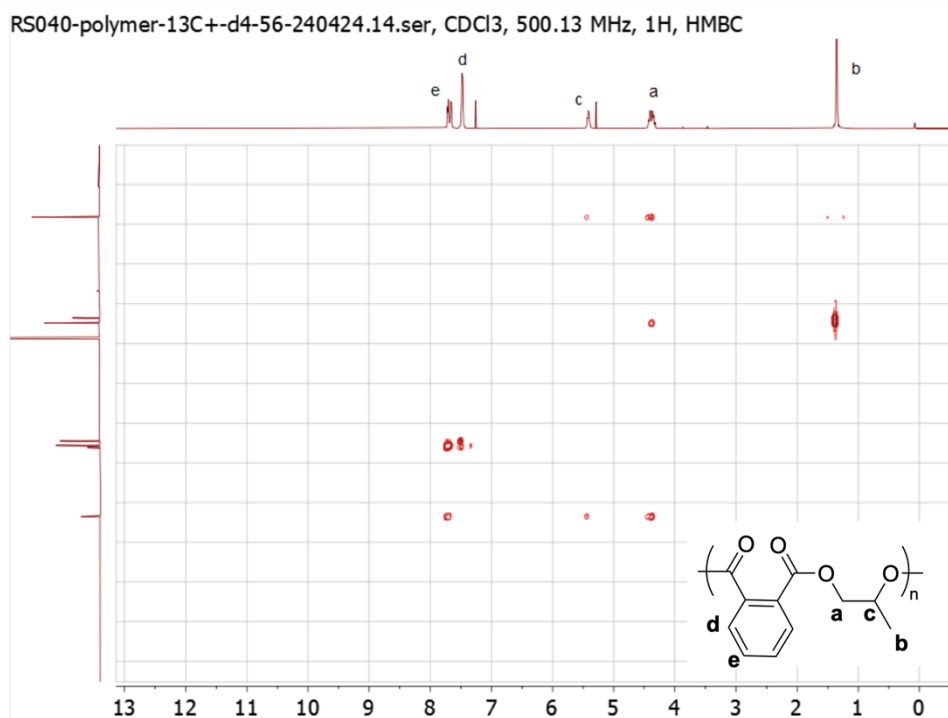

**Figure S20.** HMBC NMR spectrum (500 MHz, CDCl<sub>3</sub>) of isolated p(PA-*alt*-PO) formed from the ROCOP of PA and PO initiated by IPr. Conditions: 250/300/1 (PA/PO/IPr), no solvent, 90 °C, 16 h (80 % conversion of PA).

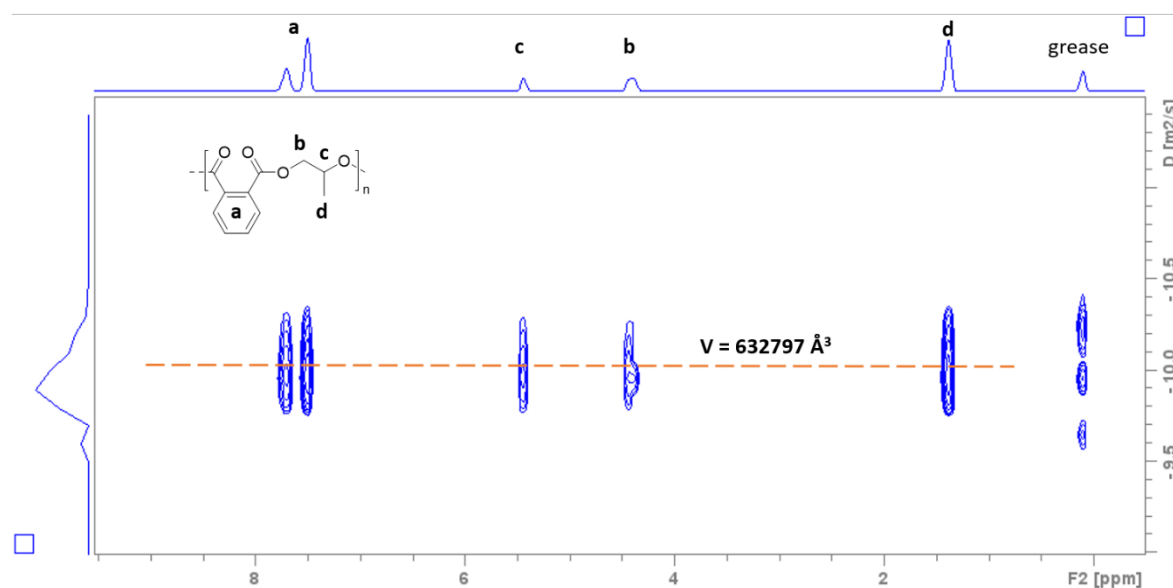

**Figure S21.** <sup>1</sup>H DOSY NMR (CDCl<sub>3</sub>, 600 MHz) of isolated poly(PA-*alt*-PO) formed from the ROCOP of PA and PO initiated by IMes (PA/PO/IMes (250/300/1), 90 °C, 16 h, 83% conversion of PA,  $M_n$  GPC = 33.05 kg mol<sup>-1</sup>,  $\bar{D}$  = 1.21). The estimated volume ( $V = 632797 \text{ \AA}^3$ ) was deduced from the measured diffusion coefficient ( $D = 7.60 \times 10^{-11} \text{ m}^2 \text{ s}^{-1}$ ).

## ==== Shimadzu LCsolution GPC Analysis Report ====

Acquired by : Admin  
 Sample Name : rs040crude  
 Sample ID : rs040crude  
 Vail# :  
 Injection Volume : 100 uL  
 Data Filename : rs040crude.lcd  
 Method Filename : gpc.lcm  
 Batch Filename :  
 Report Filename : Report\_template.lcr  
 Date Acquired : 22/03/2024 14:38:16  
 Data Processed : 22/03/2024 15:03:17

### Chromatogram & Calibration Curve

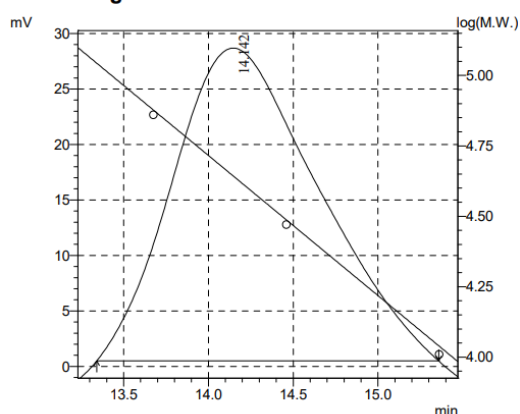

### Molecular Weight Distribution Curve

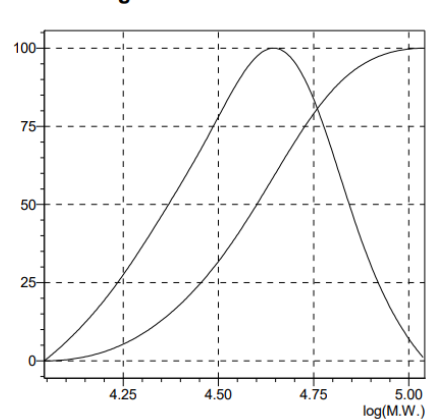

### GPC Calculation Results

Peak#:1 (Detector A Ch1)

[Peak Information]

|       | Time(min) | Volume(mL) | Molecular Weight | Height |
|-------|-----------|------------|------------------|--------|
| Start | 13.342    | 13.342     | 110448           | 509    |
| Top   | 14.142    | 14.142     | 44167            | 28185  |
| End   | 15.358    | 15.358     | 10974            | 492    |

Area : 1674633

Area% : 100.0000

[Average Molecular Weight]

|                                     |         |
|-------------------------------------|---------|
| Number Average Molecular Weight(Mn) | 34993   |
| Weight Average Molecular Weight(Mw) | 42484   |
| Z Average Molecular Weight(Mz)      | 50157   |
| Z+1 Average Molecular Weight(Mz1)   | 57382   |
| Mw/Mn                               | 1.21405 |
| Mv/Mn                               | 1.18444 |
| Mz/Mw                               | 1.18062 |

Detector A Ch1

[Average Molecular Weight(Total)]

|                                     |         |
|-------------------------------------|---------|
| Number Average Molecular Weight(Mn) | 34993   |
| Weight Average Molecular Weight(Mw) | 42484   |
| Z Average Molecular Weight(Mz)      | 50157   |
| Z+1 Average Molecular Weight(Mz1)   | 57382   |
| Mw/Mn                               | 1.21405 |
| Mv/Mn                               | 1.18444 |
| Mz/Mw                               | 1.18062 |

C:\LabSolutions\Data\Shuvo\Results\rs040crude.lcd

**Figure S22.** GPC trace of isolated p(PA-*alt*-PO) formed from the ROCOP of PA and PO initiated by IPr. Conditions: 250/300/1 (PA/CHO/IPr), no solvent, 90 °C, 16 h (80 % conversion of PA).

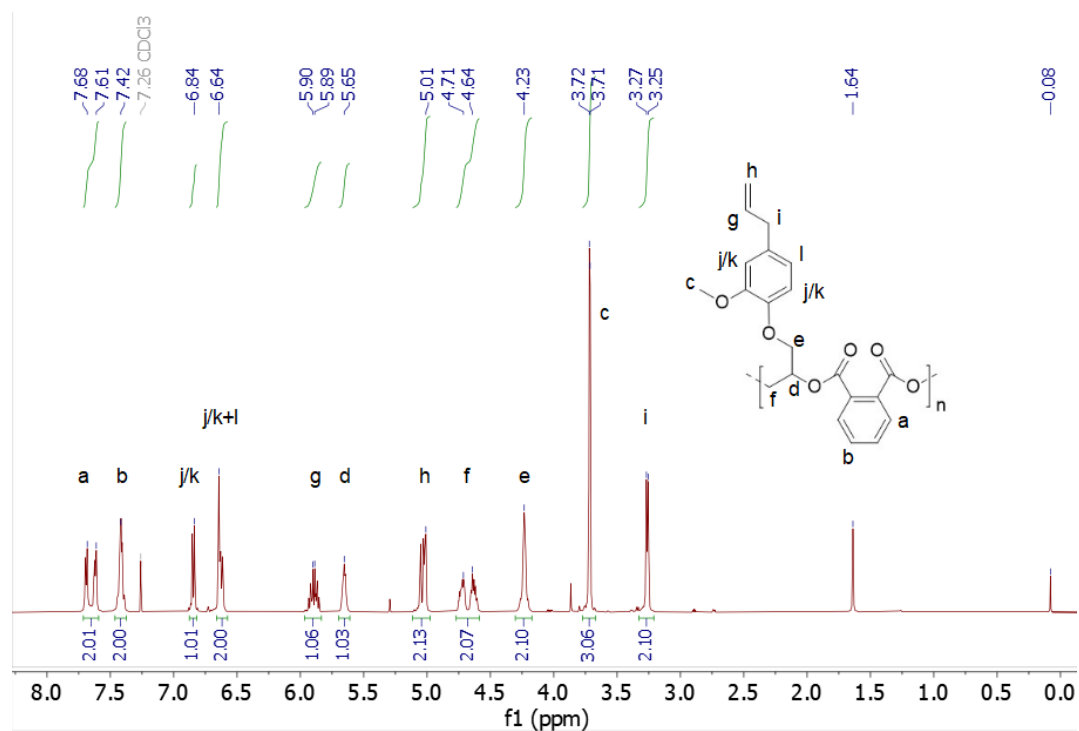

**Figure S23.** <sup>1</sup>H NMR spectrum (500 MHz, CDCl<sub>3</sub>) of isolated p(PA-*alt*-EGE) formed from the ROCOP of PA and EGE initiated by IPr. Conditions: 250/300/1 (PA/CHO/IPr), no solvent, 90 °C, 16 h (100 % conversion of PA).

## ==== Shimadzu LCsolution GPC Analysis Report ====

Acquired by : Admin  
 Sample Name : GP621A BRUT  
 Sample ID : GP621A BRUT  
 Vial# :  
 Injection Volume : 100 uL  
 Data Filename : GP621A BRUT.lcd  
 Method Filename : gpc.lcm  
 Batch Filename :  
 Report Filename : Report\_template.lcr  
 Date Acquired : 08/09/2022 17:13:59  
 Data Processed : 08/09/2022 17:37:37

### Chromatogram & Calibration Curve

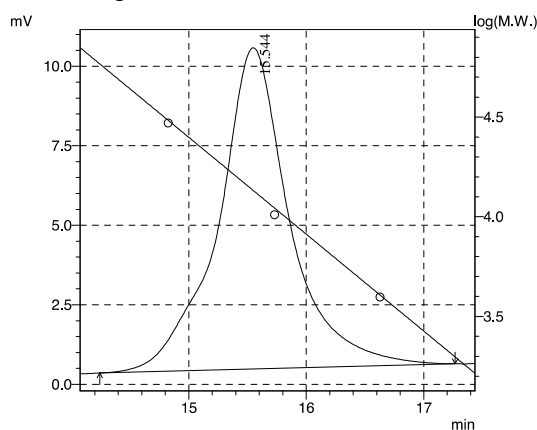

### Molecular Weight Distribution Curve

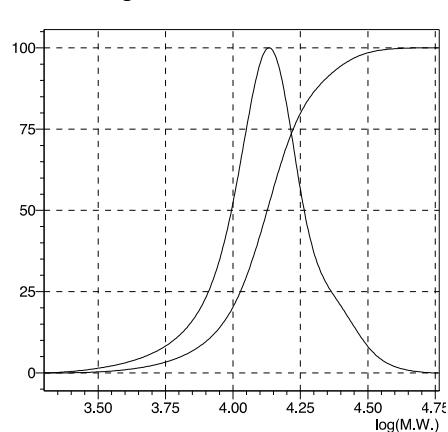

### GPC Calculation Results

Peak#:1 (Detector A Ch1)

[Peak Information]

|       | Time(min) | Volume(mL) | Molecular Weight | Height |
|-------|-----------|------------|------------------|--------|
| Start | 14.242    | 14.242     | 58430            | 356    |
| Top   | 15.544    | 15.544     | 13612            | 10102  |
| End   | 17.267    | 17.267     | 1982             | 644    |

Area : 428543  
Area% : 100.0000

[Average Molecular Weight]

|                                     |         |
|-------------------------------------|---------|
| Number Average Molecular Weight(Mn) | 12113   |
| Weight Average Molecular Weight(Mw) | 14370   |
| Z Average Molecular Weight(Mz)      | 16781   |
| Z+1 Average Molecular Weight(Mz1)   | 19592   |
| Mw/Mn                               | 1.18630 |
| Mv/Mn                               | 1.16088 |
| Mz/Mw                               | 1.16778 |

Detector A Ch1

[Average Molecular Weight(Total)]

|                                     |         |
|-------------------------------------|---------|
| Number Average Molecular Weight(Mn) | 12113   |
| Weight Average Molecular Weight(Mw) | 14370   |
| Z Average Molecular Weight(Mz)      | 16781   |
| Z+1 Average Molecular Weight(Mz1)   | 19592   |
| Mw/Mn                               | 1.18630 |
| Mv/Mn                               | 1.16088 |
| Mz/Mw                               | 1.16778 |

**Figure S24.** GPC traces of crude p(PA-*alt*-EGE) produced from the ROCOP of PA and EGE initiated by IPr. Conditions: 70/85/1 (PA/EGE/IPr), no solvent, 90 °C, 5 h (83 % conversion of PA).

## ==== Shimadzu LCsolution GPC Analysis Report ====

Acquired by : Admin  
 Sample Name : rs068polymer  
 Sample ID : rs068polymer  
 Vail# :  
 Injection Volume : 100 uL  
 Data Filename : rs068polymer.lcd  
 Method Filename : gpc.lcm  
 Batch Filename :  
 Report Filename : Report\_template.lcr  
 Date Acquired : 04/06/2024 17:31:49  
 Data Processed : 04/06/2024 17:56:52

### Chromatogram & Calibration Curve

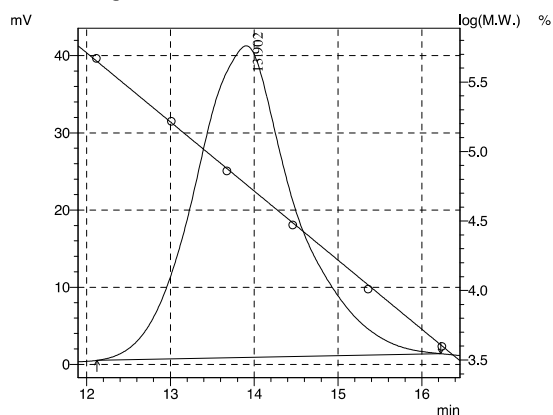

### Molecular Weight Distribution Curve

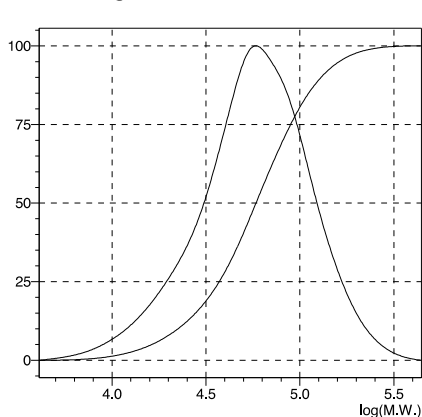

### GPC Calculation Results

Peak#:1 (Detector A Ch1)

[Peak Information]

|       | Time(min) | Volume(mL) | Molecular Weight | Height |
|-------|-----------|------------|------------------|--------|
| Start | 12.125    | 12.125     | 444776           | 527    |
| Top   | 13.902    | 13.902     | 58180            | 40368  |
| End   | 16.225    | 16.225     | 4068             | 1389   |

Area : 3338290  
 Area% : 100.0000

[Average Molecular Weight]

|                                     |         |
|-------------------------------------|---------|
| Number Average Molecular Weight(Mn) | 43532   |
| Weight Average Molecular Weight(Mw) | 69965   |
| Z Average Molecular Weight(Mz)      | 102548  |
| Z+1 Average Molecular Weight(Mz1)   | 141100  |
| Mw/Mn                               | 1.60721 |
| Mv/Mn                               | 1.51836 |
| Mz/Mw                               | 1.46571 |

Detector A Ch1

[Average Molecular Weight(Total)]

|                                     |         |
|-------------------------------------|---------|
| Number Average Molecular Weight(Mn) | 43532   |
| Weight Average Molecular Weight(Mw) | 69965   |
| Z Average Molecular Weight(Mz)      | 102548  |
| Z+1 Average Molecular Weight(Mz1)   | 141100  |
| Mw/Mn                               | 1.60721 |
| Mv/Mn                               | 1.51836 |
| Mz/Mw                               | 1.46571 |

**Figure S25.** GPC traces of crude p(PA-*alt*-EGE) produced from the ROCOP of PA and EGE initiated by IPr. Conditions: 250/300/1 (PA/EGE/IPr), no solvent, 90 °C, 16 h (100 % conversion of PA).

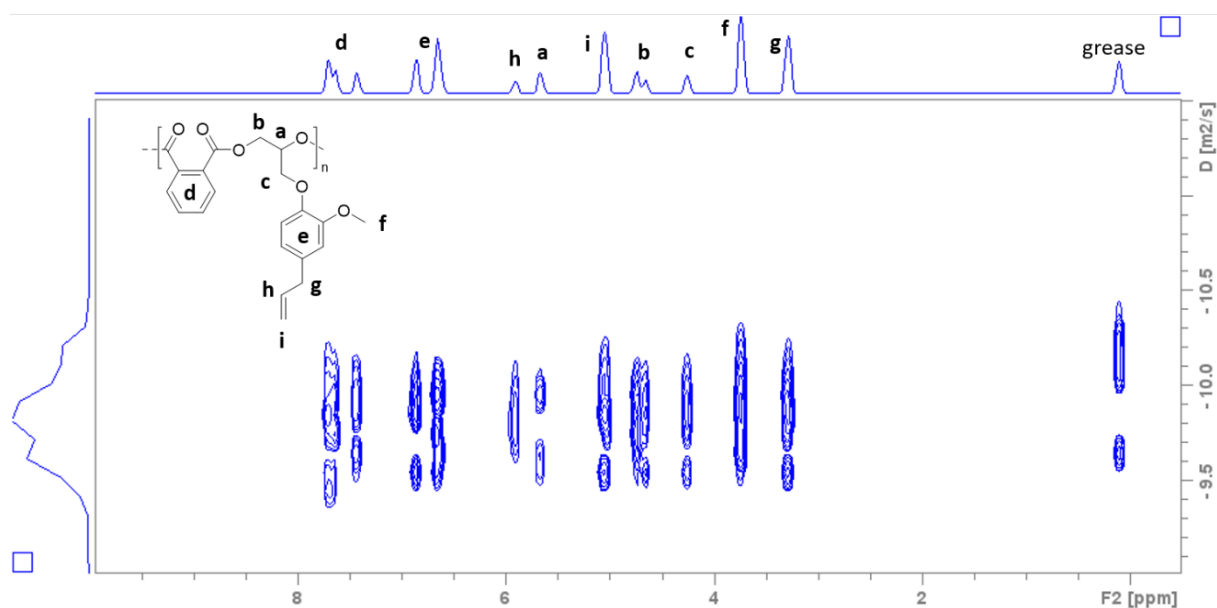

**Figure S26.**  $^1\text{H}$  DOSY NMR ( $\text{CDCl}_3$ , 600 MHz) of isolated poly(PA-*alt*-EGE) formed from the ROCOP of PA and EGE initiated by IPr (PA/EGE/IPr (70/85/1), 90 °C, 5 h, 100% conversion of PA,  $M_{n, \text{GPC}} = 43.5 \text{ kg mol}^{-1}$ ,  $\bar{D} = 1.6$ ). The estimated volume ( $V = 208702 \text{ \AA}^3$ ) was deduced from the measured diffusion coefficient ( $D = 1.10 \times 10^{-10} \text{ m}^2 \text{ s}^{-1}$ ).

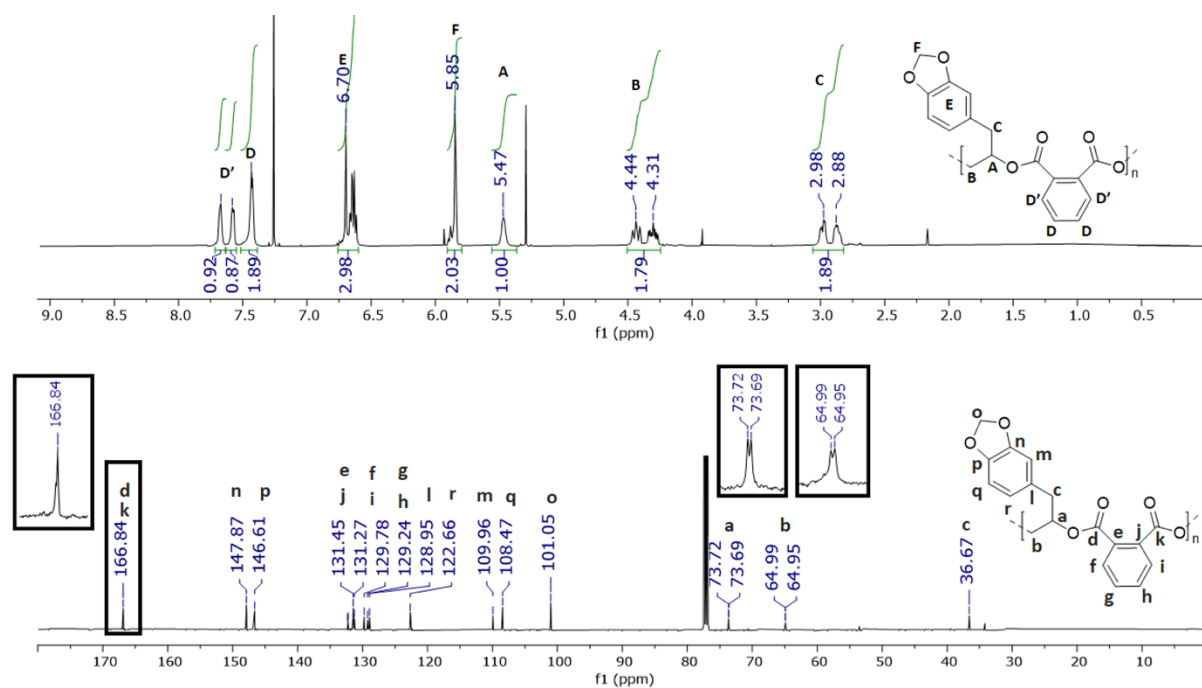

**Figure S27.**  $^1\text{H}$  and  $^{13}\text{C}\{^1\text{H}\}$  NMR spectrum (125 MHz,  $\text{CDCl}_3$ ) of isolated p(PA-*alt*-SO) formed from the ROCOP of PA and SO initiated by IPr. Conditions: 250/300/1 (PA/CHO/IPr), no solvent, 90 °C, 16 h (100 % conversion of PA).



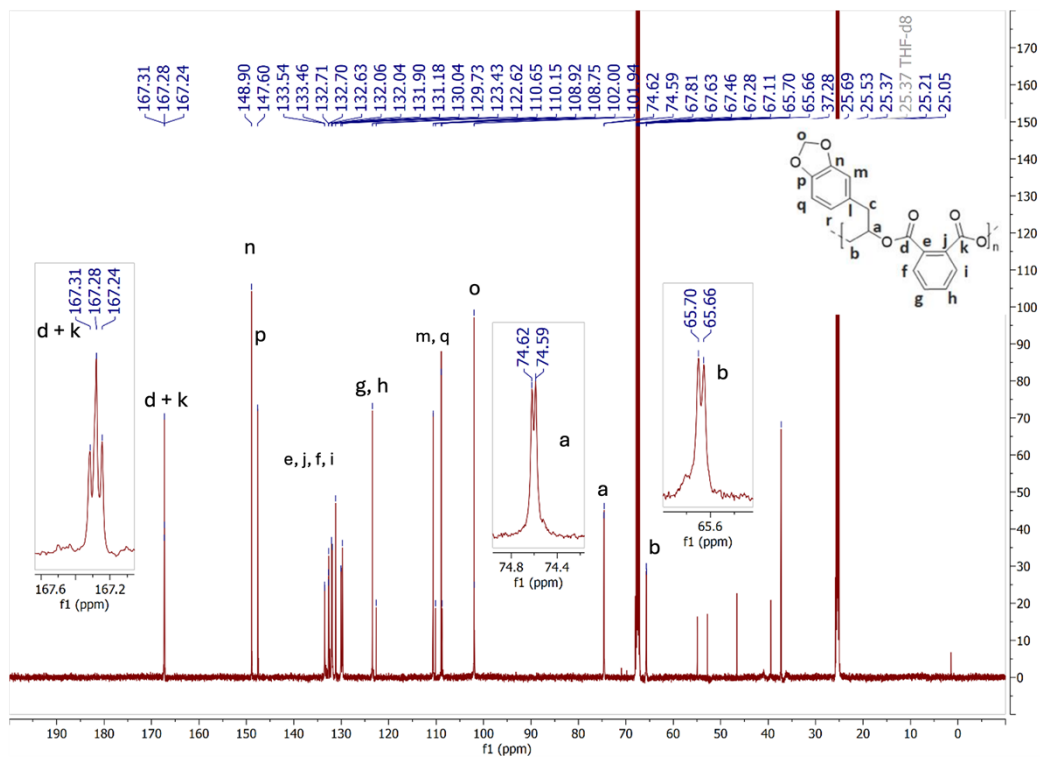

**Figure S28.** <sup>13</sup>C NMR (125 MHz, THF-d<sup>8</sup>) spectrum of poly(PA-*alt*-SO).

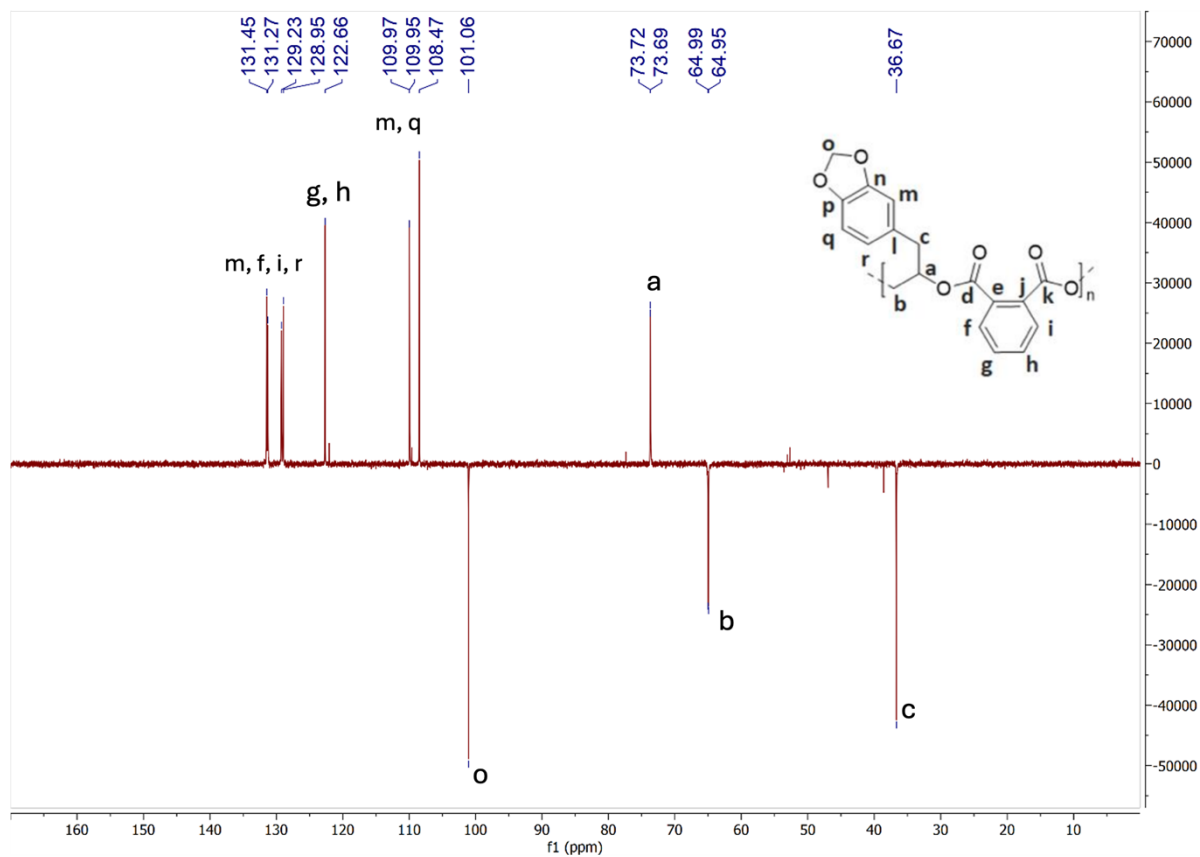

**Figure S29.** DEPT 135 NMR (125 MHz, CDCl<sub>3</sub>) spectrum of poly(PA-*alt*-SO).

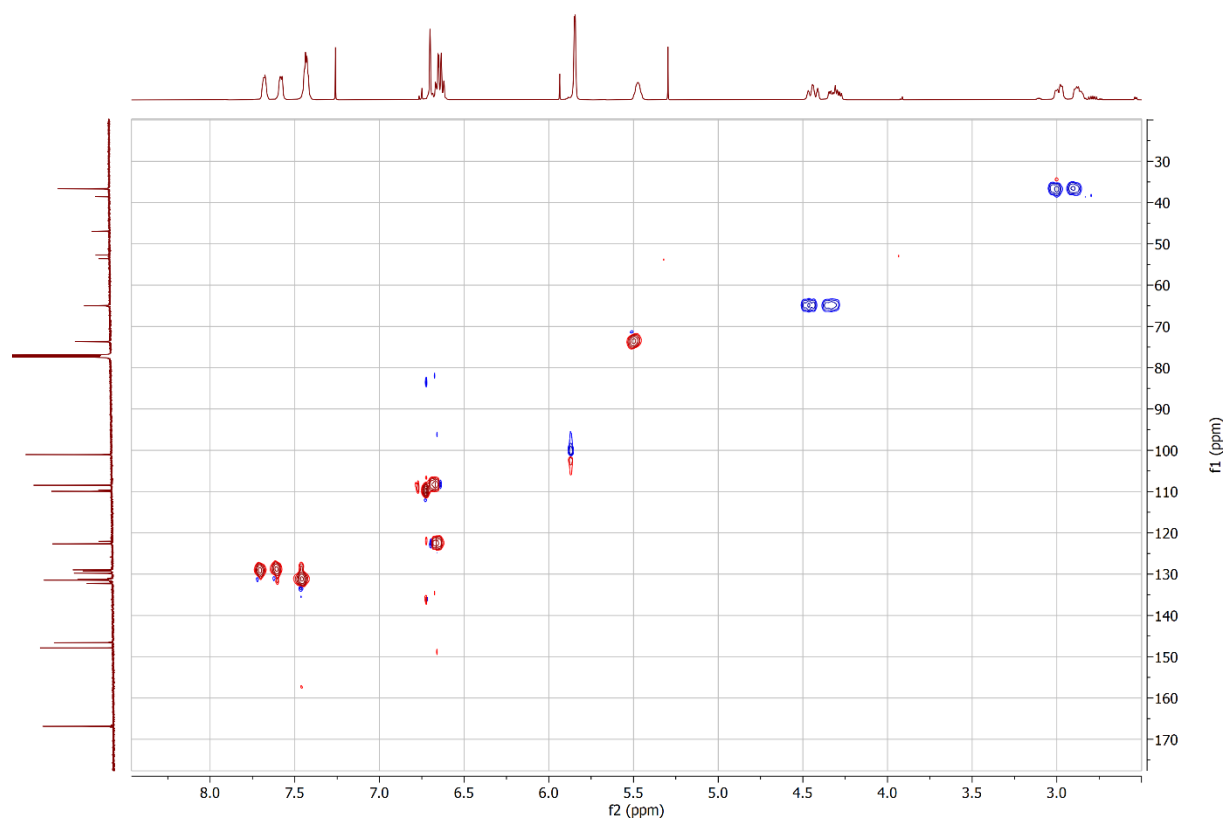

**Figure S30.** HSQC NMR (500 MHz, 125 MHz, CDCl<sub>3</sub>) spectrum of poly(PA-*alt*-SO).

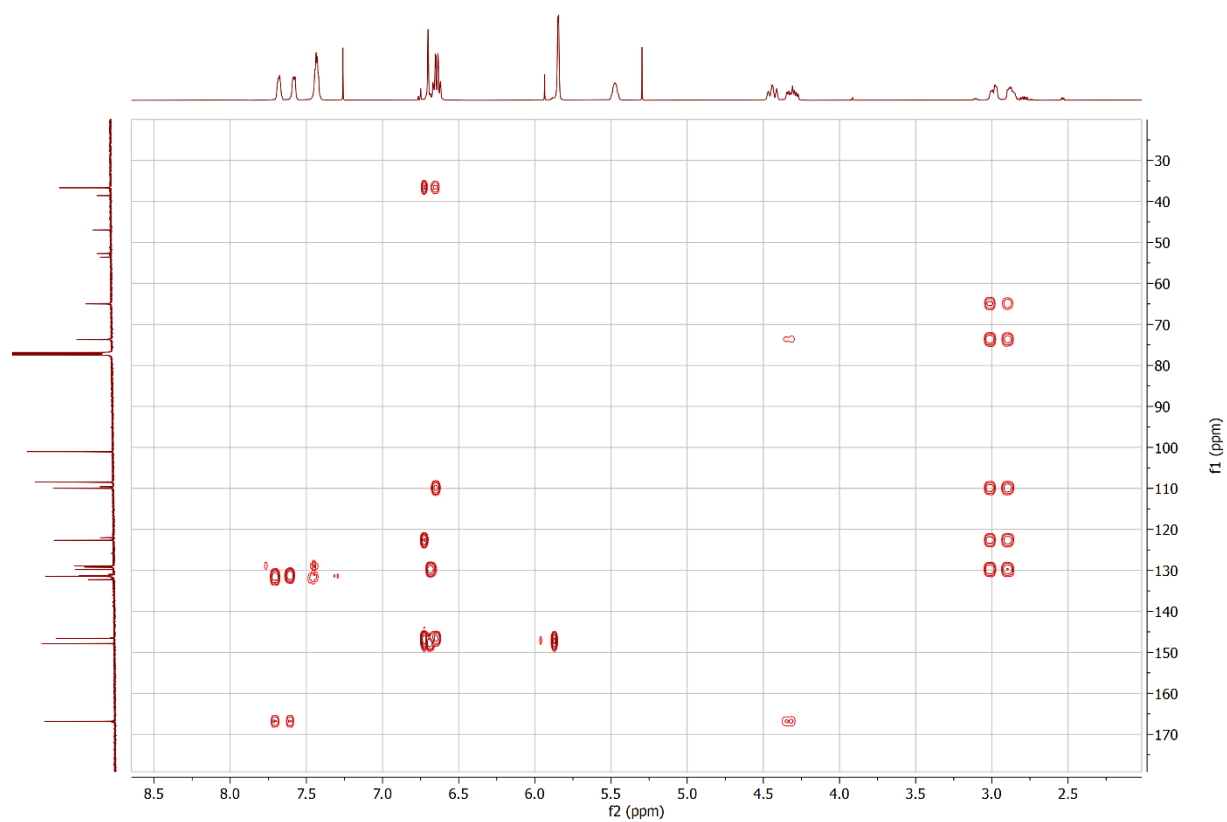

**Figure S31.** HMBC NMR (500 MHz, 125 MHz, CDCl<sub>3</sub>) spectrum of poly(PA-*alt*-SO).

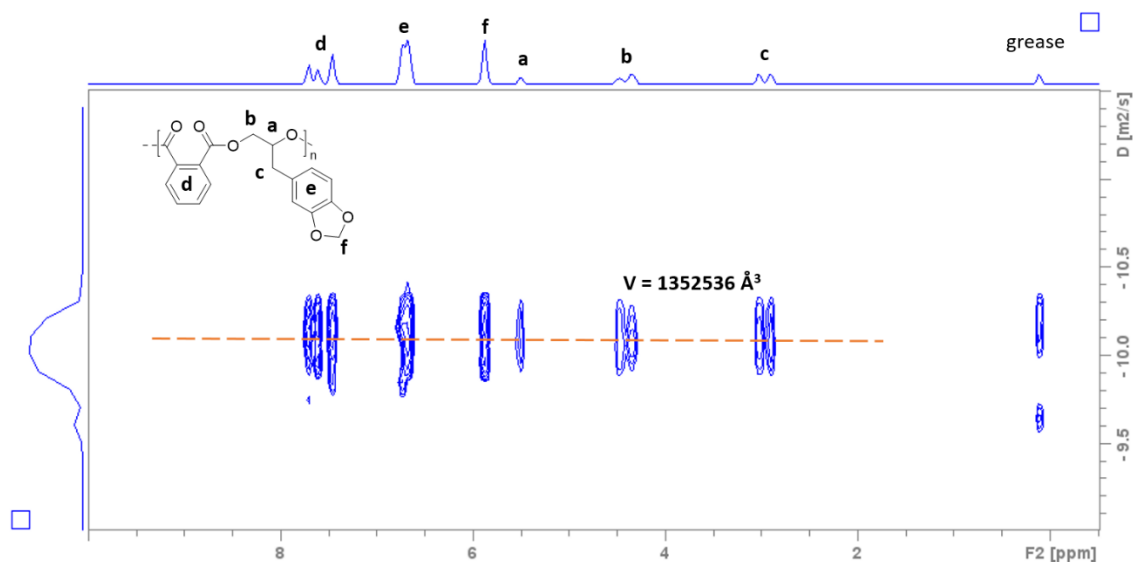

**Figure S32.**  $^1\text{H}$  DOSY NMR ( $\text{CDCl}_3$ , 600 MHz) of isolated poly(PA-*alt*-SO) formed from the ROCOP of PA and SO initiated by IPr (PA/SO/IPr (250/300/1), 90 °C, 16 h, 85% conversion of PA,  $M_n \text{ GPC} = 45.3 \text{ kg mol}^{-1}$ ,  $D = 1.39$ ). The estimated volume ( $V = 1352536 \text{ \AA}^3$ ) was deduced from the measured diffusion coefficient ( $D = 5.90 \times 10^{-11} \text{ m}^2 \text{ s}^{-1}$ ).

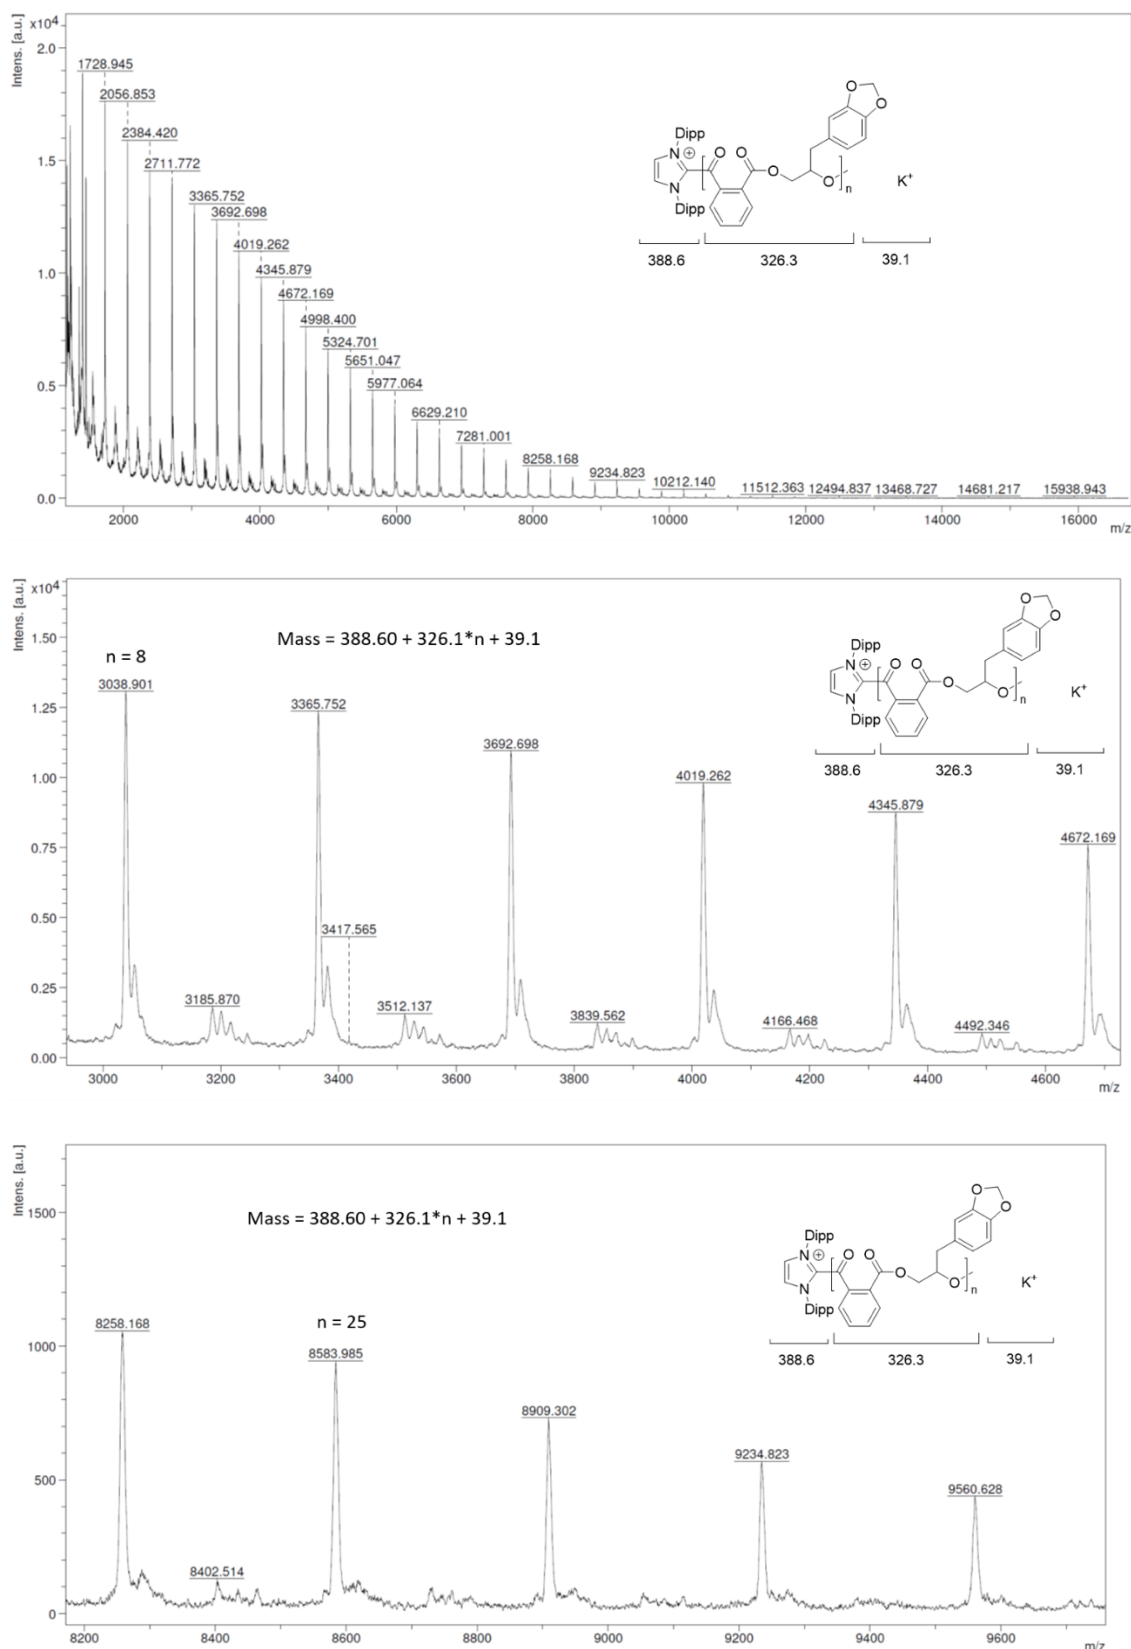

**Figure S33.** MALDI-TOF mass spectra (including the full spectrum and two zooms: top, central and bottom spectrum, respectively) for isolated p(PA-*alt*-SO) formed from the ROCOP of PA and SO initiated by IPr. Conditions: 20/25/1 (PA/SO/IPr), no solvent, 90 °C, 6 h (> 95 % conversion of PA).

### ==== Shimadzu LCsolution GPC Analysis Report ====

Acquired by : Admin  
 Sample Name : AS059 crude  
 Sample ID : AS059 crude  
 Vial# :  
 Injection Volume : 100 uL  
 Data Filename : AS059 crude.lcd  
 Method Filename : gpc.lcm  
 Batch Filename :  
 Report Filename : Report\_template.lcr  
 Date Acquired : 24/05/2024 16:42:15  
 Data Processed : 24/05/2024 17:07:18

#### Chromatogram & Calibration Curve

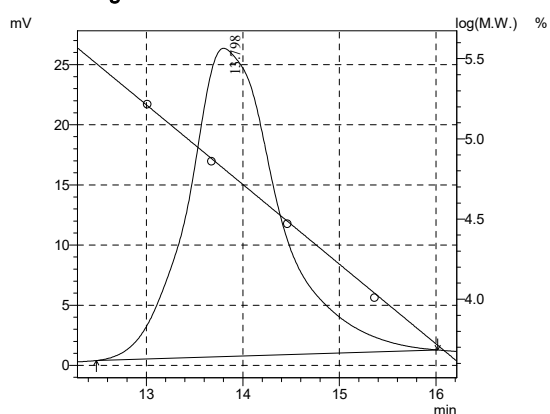

#### Molecular Weight Distribution Curve

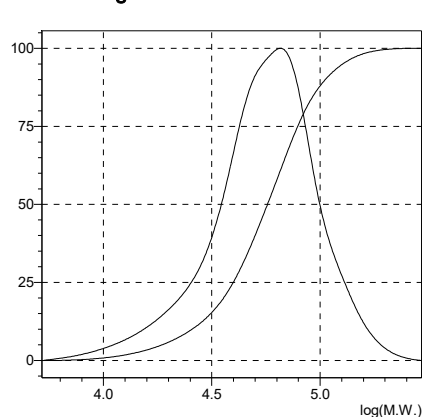

#### GPC Calculation Results

Peak#:1 (Detector A Ch1)

[Peak Information]

|       | Time(min) | Volume(mL) | Molecular Weight | Height |
|-------|-----------|------------|------------------|--------|
| Start | 12.483    | 12.483     | 295095           | 400    |
| Top   | 13.798    | 13.798     | 65516            | 25635  |
| End   | 16.017    | 16.017     | 5164             | 1276   |

Area : 1676352

Area% : 100.0000

[Average Molecular Weight]

|                                     |         |
|-------------------------------------|---------|
| Number Average Molecular Weight(Mn) | 45273   |
| Weight Average Molecular Weight(Mw) | 63067   |
| Z Average Molecular Weight(Mz)      | 81330   |
| Z+1 Average Molecular Weight(Mz1)   | 101162  |
| Mw/Mn                               | 1.39303 |
| Mv/Mn                               | 1.34106 |
| Mz/Mw                               | 1.28959 |

Detector A Ch1

[Average Molecular Weight(Total)]

|                                     |         |
|-------------------------------------|---------|
| Number Average Molecular Weight(Mn) | 45273   |
| Weight Average Molecular Weight(Mw) | 63067   |
| Z Average Molecular Weight(Mz)      | 81330   |
| Z+1 Average Molecular Weight(Mz1)   | 101162  |
| Mw/Mn                               | 1.39303 |
| Mv/Mn                               | 1.34106 |
| Mz/Mw                               | 1.28959 |

C:\LabSolutions\Data\Antoine\DonnUes\AS059 crude.lcd

**Figure S34.** GPC traces of crude p(PA-*alt*-SO) produced from the ROCOP of PA and SO initiated by IPr. Conditions: 250/300/1 (PA/SO/IPr), no solvent, 90 °C, 16 h (85 % conversion of PA).

## DSC data

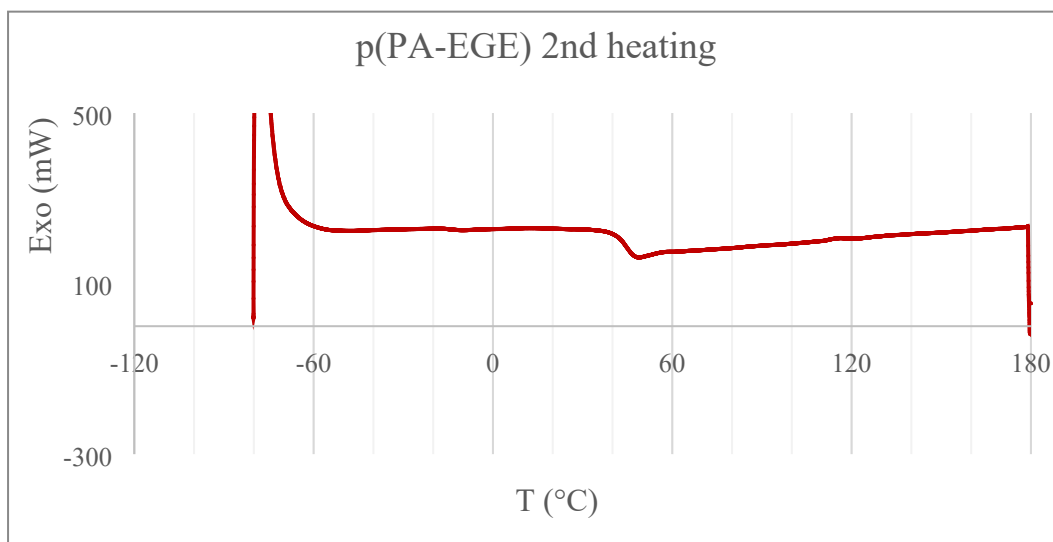

**Figure S35.** DSC thermogram for an isolated p(PA-*alt*-EGE) material ( $M_n = 12.1 \text{ kg}\cdot\text{mol}^{-1}$ ,  $\bar{D} = 1.20$ ). Sweeping rate:  $10 \text{ }^\circ\text{C}$  per minute. Only the second heating process is depicted and is in line with an amorphous material ( $T_g = 44 \text{ }^\circ\text{C}$ ).

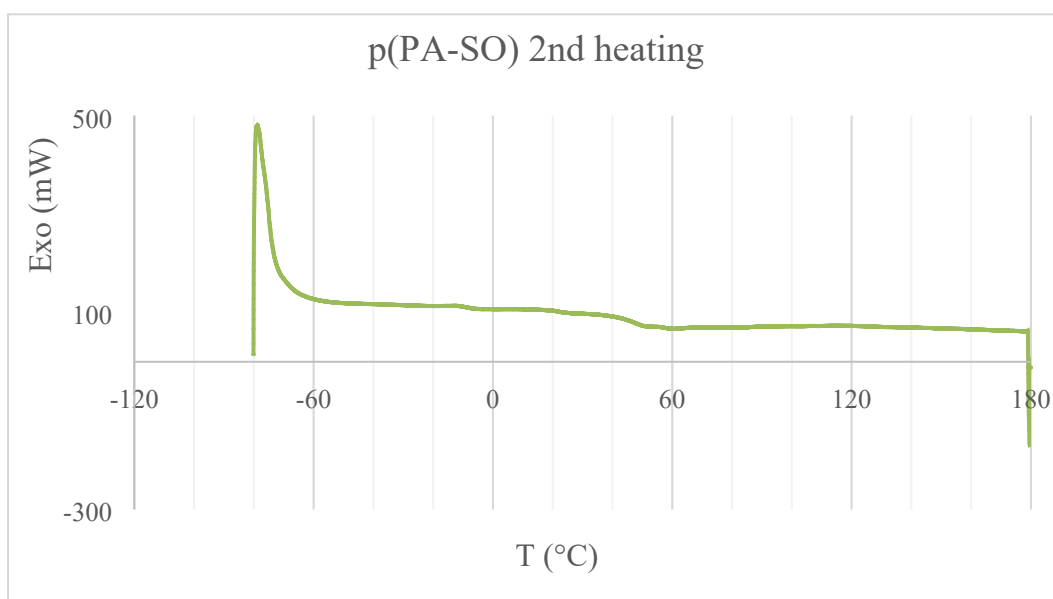

**Figure S36.** DSC thermogram for an isolated p(PA-*alt*-EGE) material ( $M_n = 45.3 \text{ kg}\cdot\text{mol}^{-1}$ ,  $\bar{D} = 1.39$ ). Sweeping rate:  $10 \text{ }^\circ\text{C}$  per minute. Only the second heating process is shown and is in line with an amorphous material ( $T_g = 48 \text{ }^\circ\text{C}$ ).

## DFT Computational details

All calculations were performed with GAUSSIAN 16 (version C01) at DFT level (functional  $\omega$ B97XD).<sup>9</sup> All atoms were described by Pople bases 6-31+G\*\*.<sup>10</sup> Calculations were performed in THF to model solvation by epoxide. All structures were optimized and the nature of the met stationary point determined by frequency calculation. Minima are characterized by a set of real frequencies and transition states by an imaginary frequency. The free energy was extracted from this frequency calculation. The origin of the energies is constituted by the separate fragments.

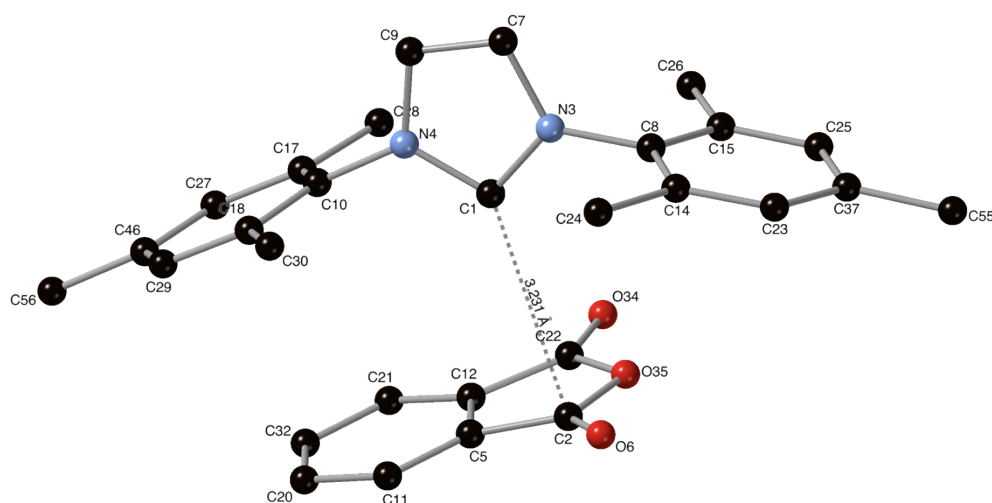

**Figure S37.** Molecular structure of reactant complex associating a model of IMes (A) and a PA model (B).

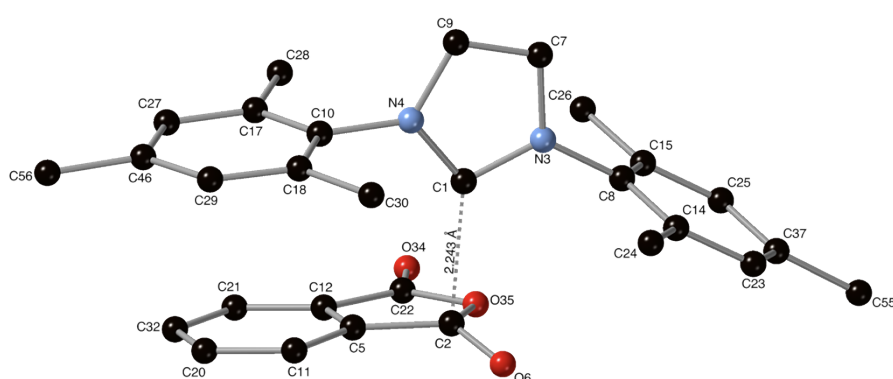

**Figure S38.** Molecular structure of transition state TS resulting from the nucleophilic attack of B by A.

<sup>9</sup> J.-D. Chai, M. Head-Gordon, *Phys. Chem. Chem. Phys.*, **2008**, *10*, 6615.

<sup>10</sup> R. Ditchfield, W. J. Hehre, J. A. Pople, *J. Chem. Phys.*, **1971**, *54*, 724.

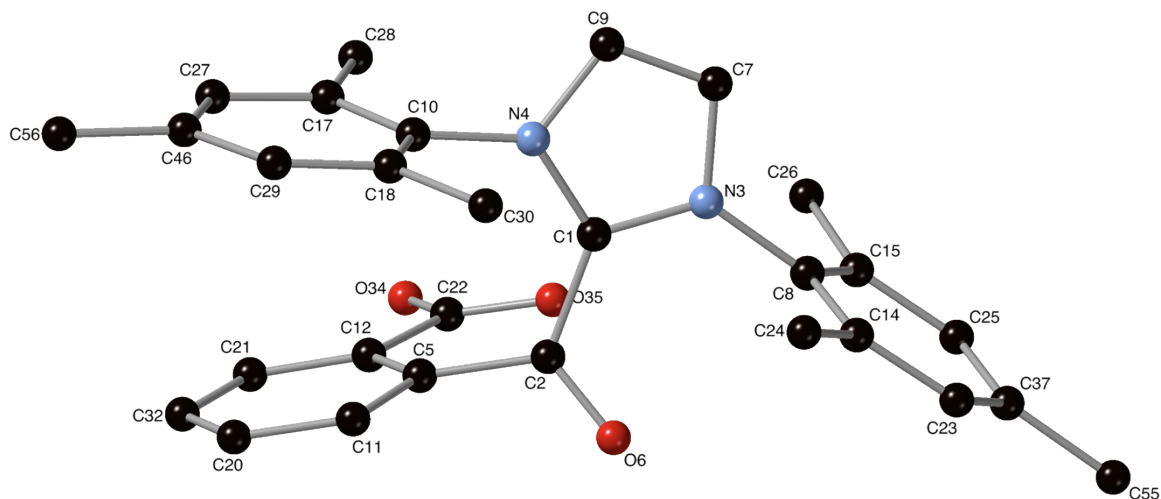

**Figure S39.** Molecular structure of the ring-opened model product **D**.

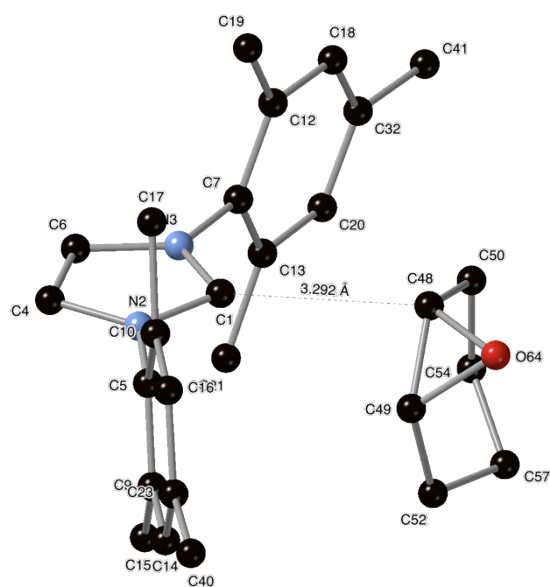

**Figure S40.** Molecular structure of reactant complex associating a model of IMes (**A**) and a CHO model (**C**).



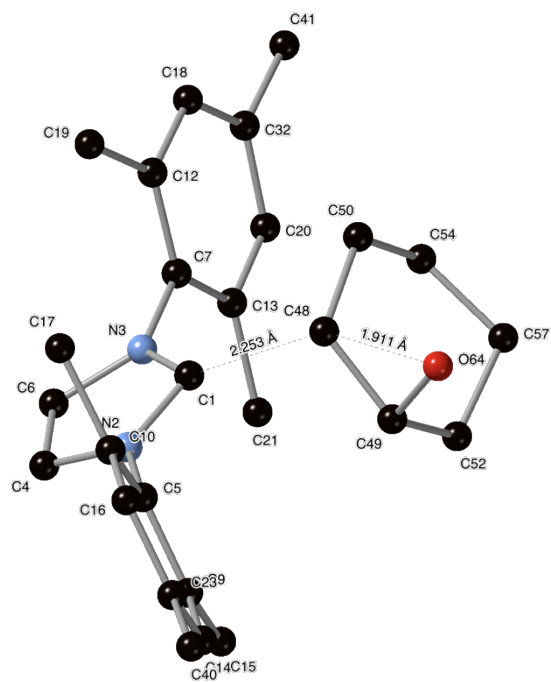

**Figure S41.** Molecular structure of transition state TS' resulting from the nucleophilic attack of C by A.

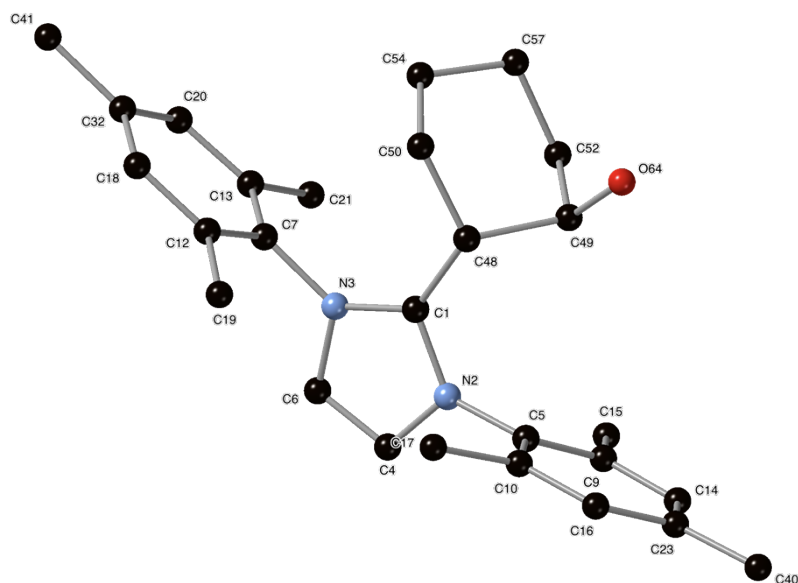

**Figure S42.** Molecular structure of the ring-opened model product E.
